# Supplementary material
Source: PubMed Central journal article supplement (PMC5364945)

- Annotation-1
- Day 14
  - Day 2
  - Day 21
  - Day 28
  - Day 35
  - Day 42
  - Day 7

Supplementary Figure 1 - Representative metabolite of the RBC storage lesion, as gleaned through the three minute method

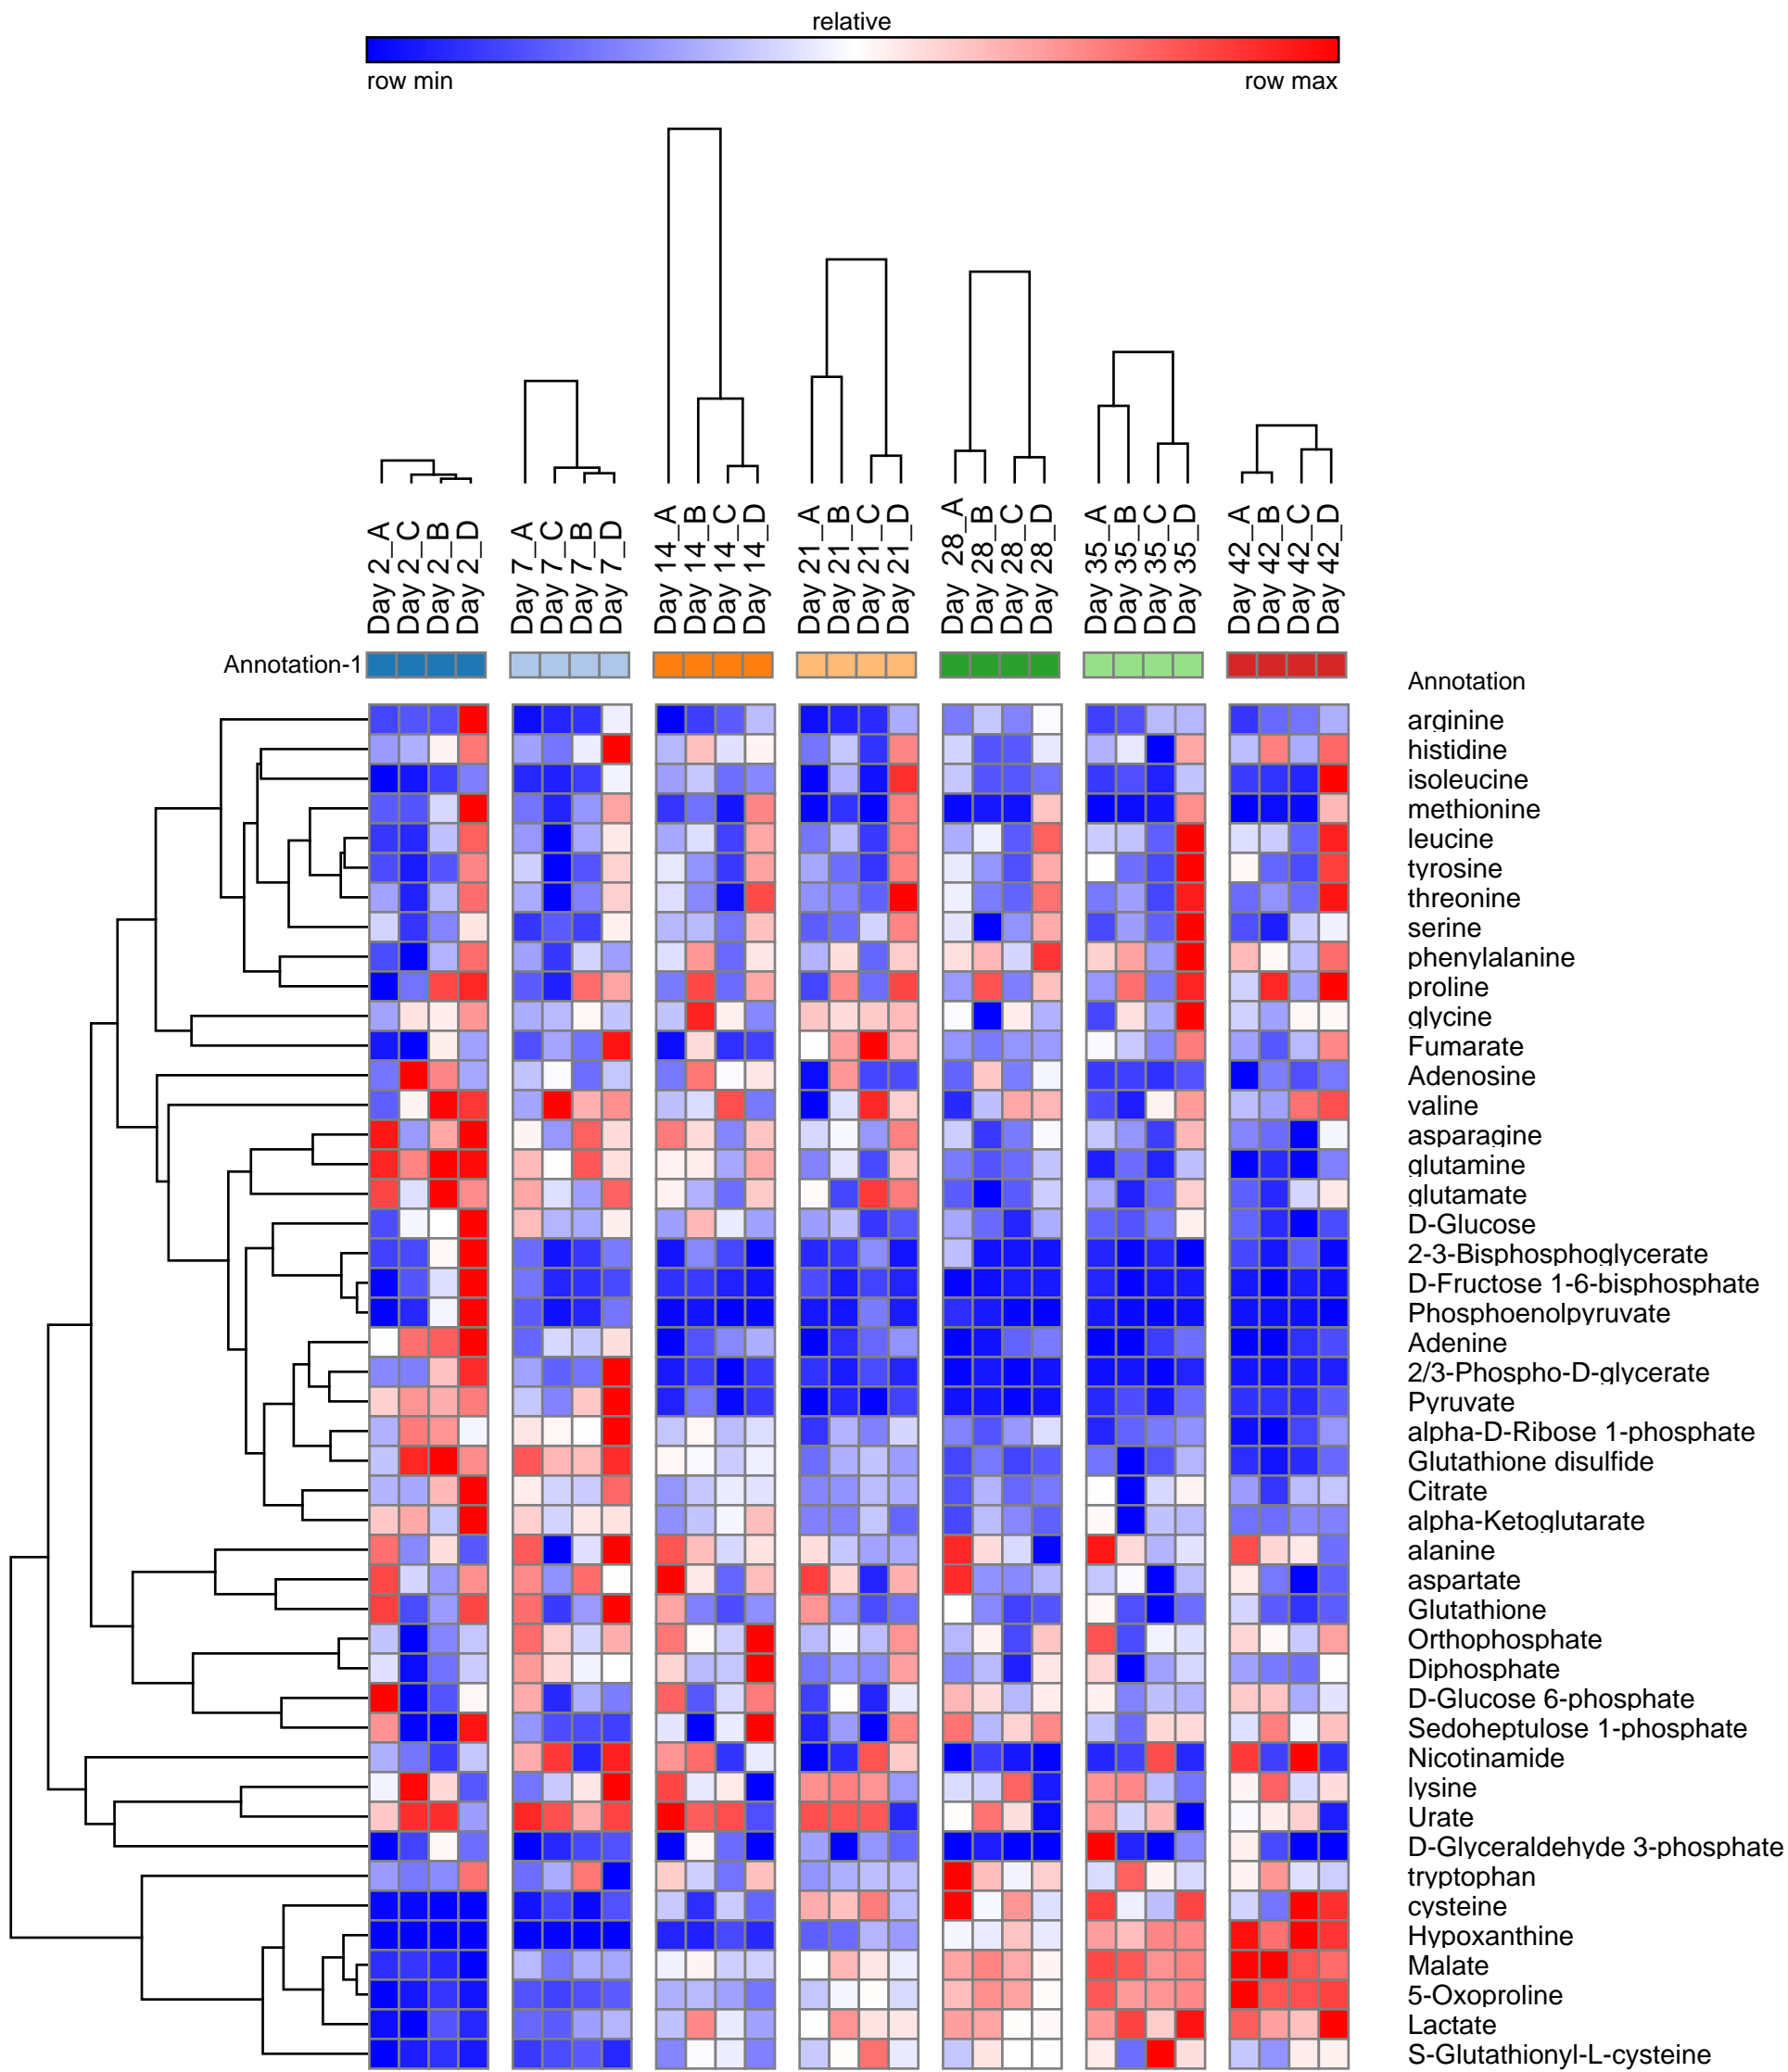

Annotation-1  
 Day 14  
 Day 2  
 Day 21  
 Day 28  
 Day 35  
 Day 42  
 Day 7

Supplementary Figure 1 - Representative metabolite of the RBC storage lesion, as gleaned through a 9 min C18-based gradient

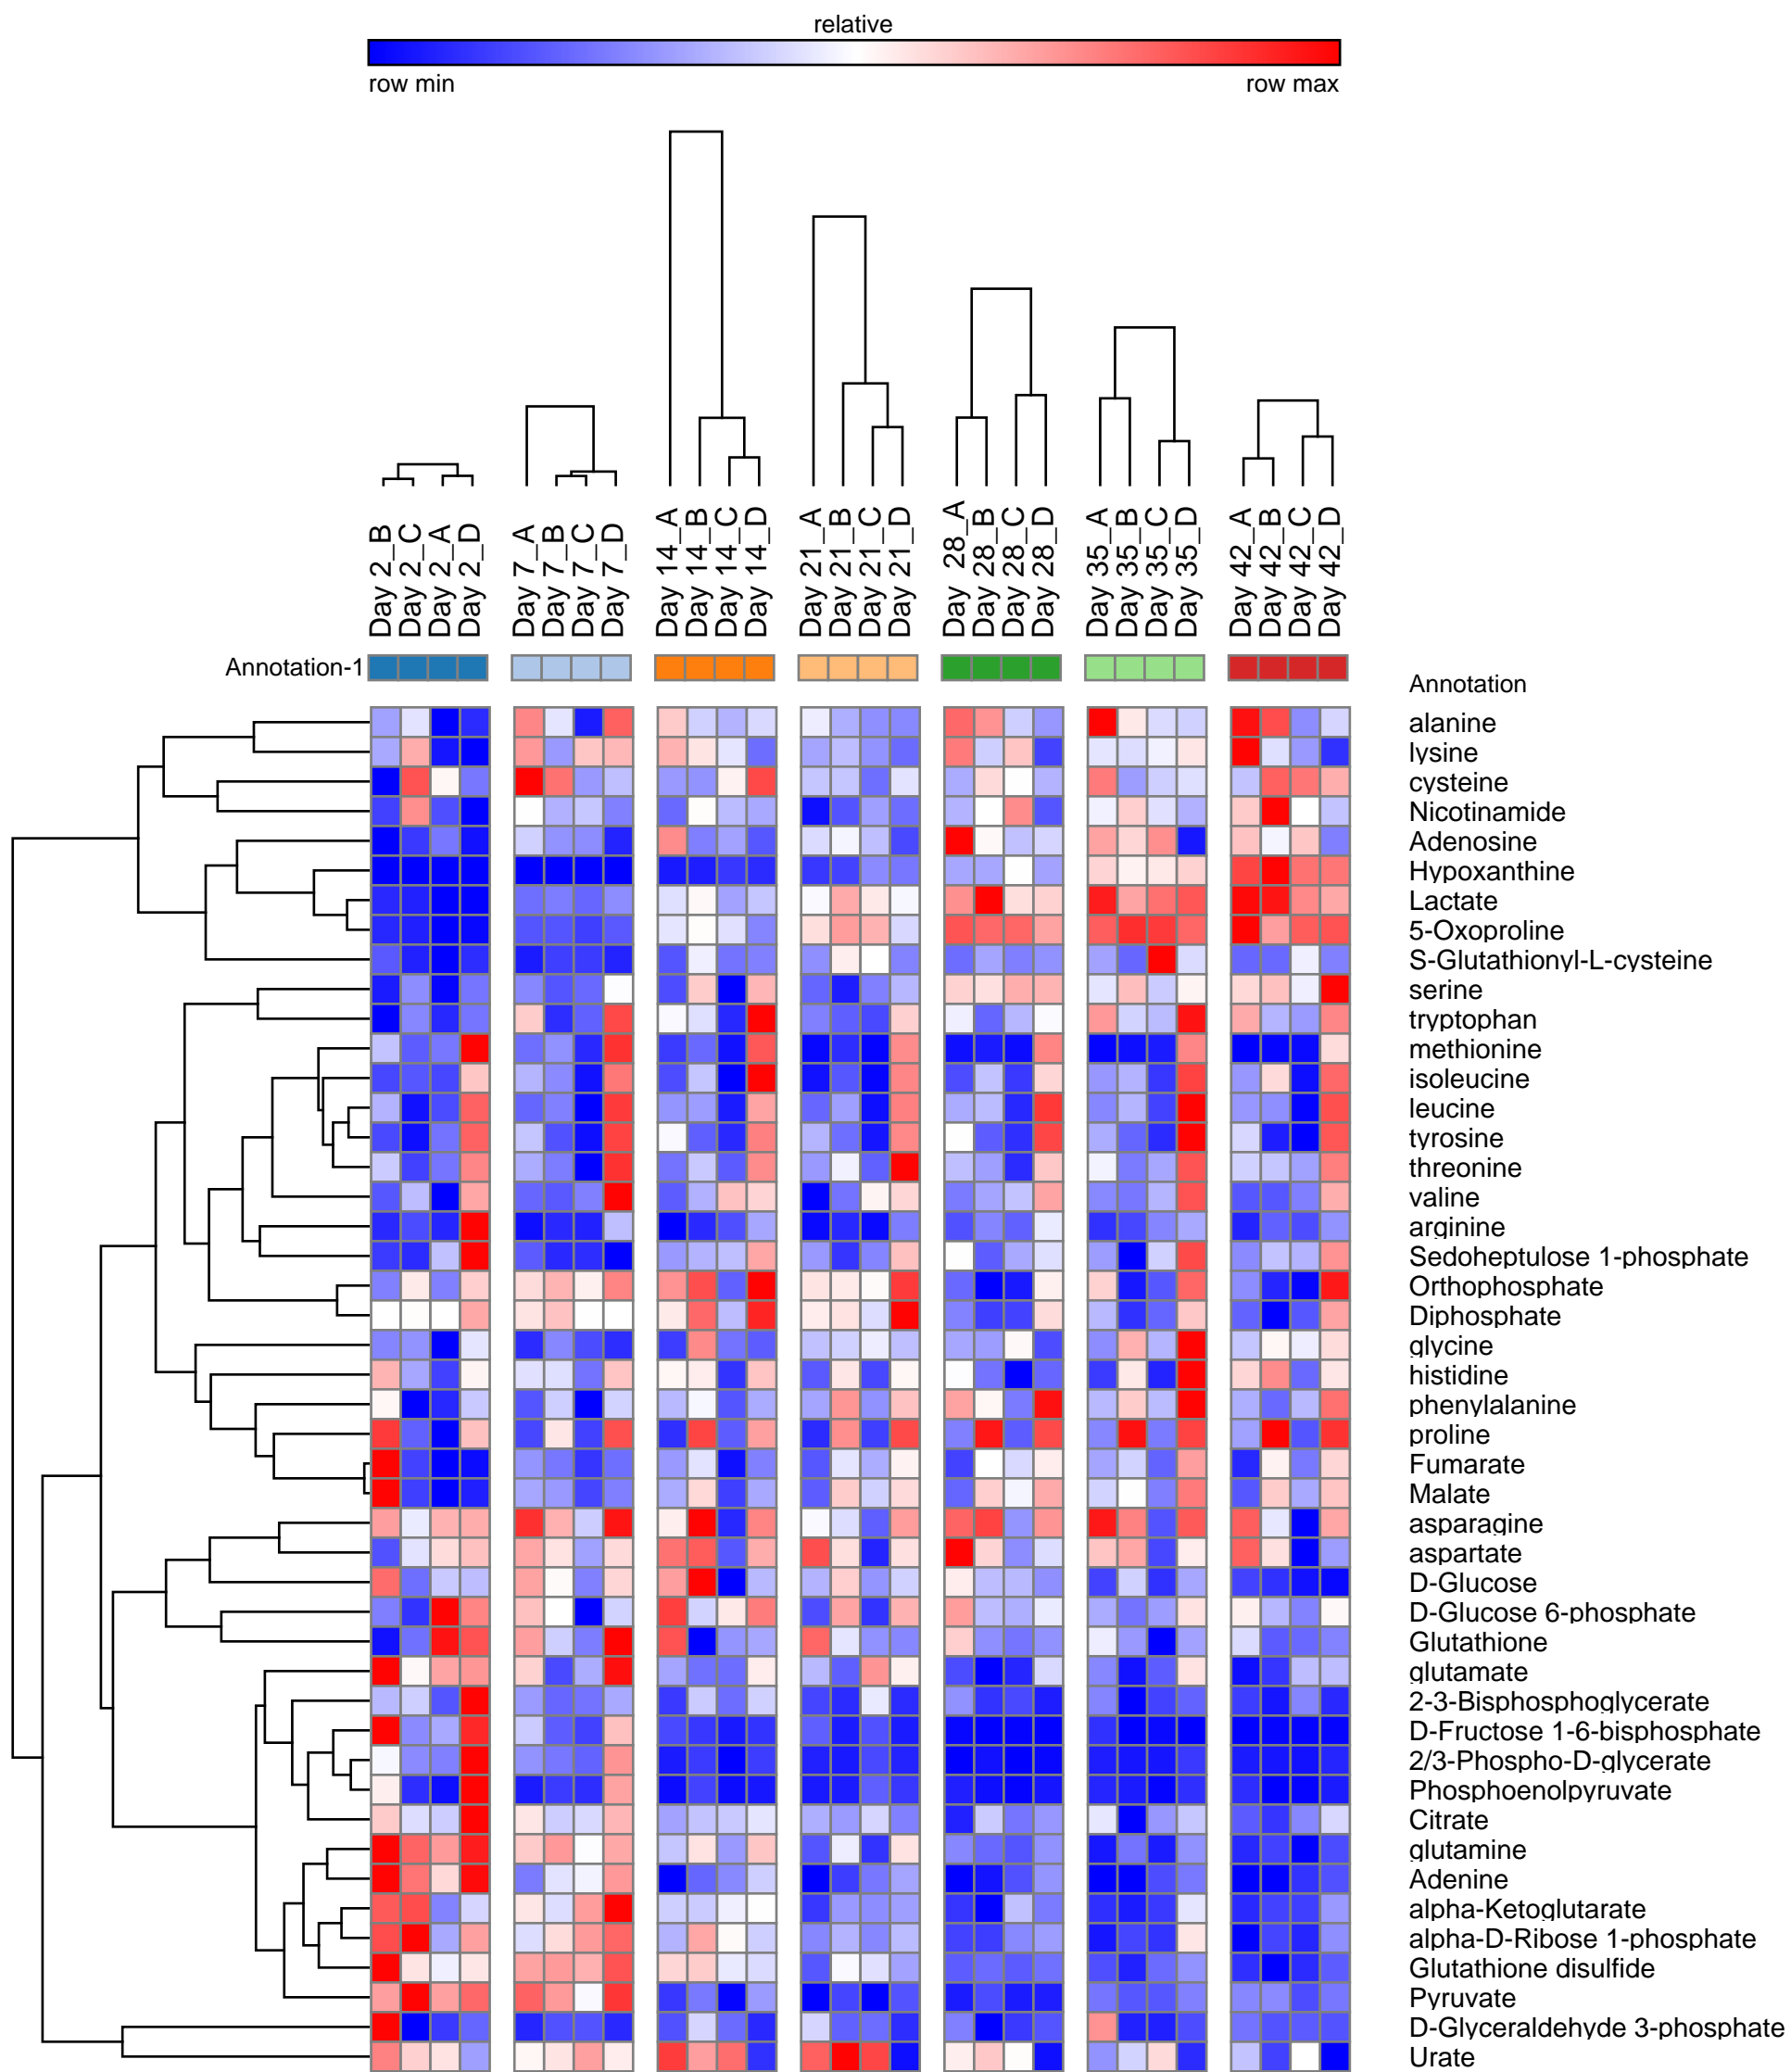

- Day 14
- Day 2
- Day 21
- Day 28
- Day 35
- Day 42
- Day 7

Supplementary Figure 1 - Representative metabolite of the RBC storage lesion, as gleaned through a 15 min HILIC-based gradient

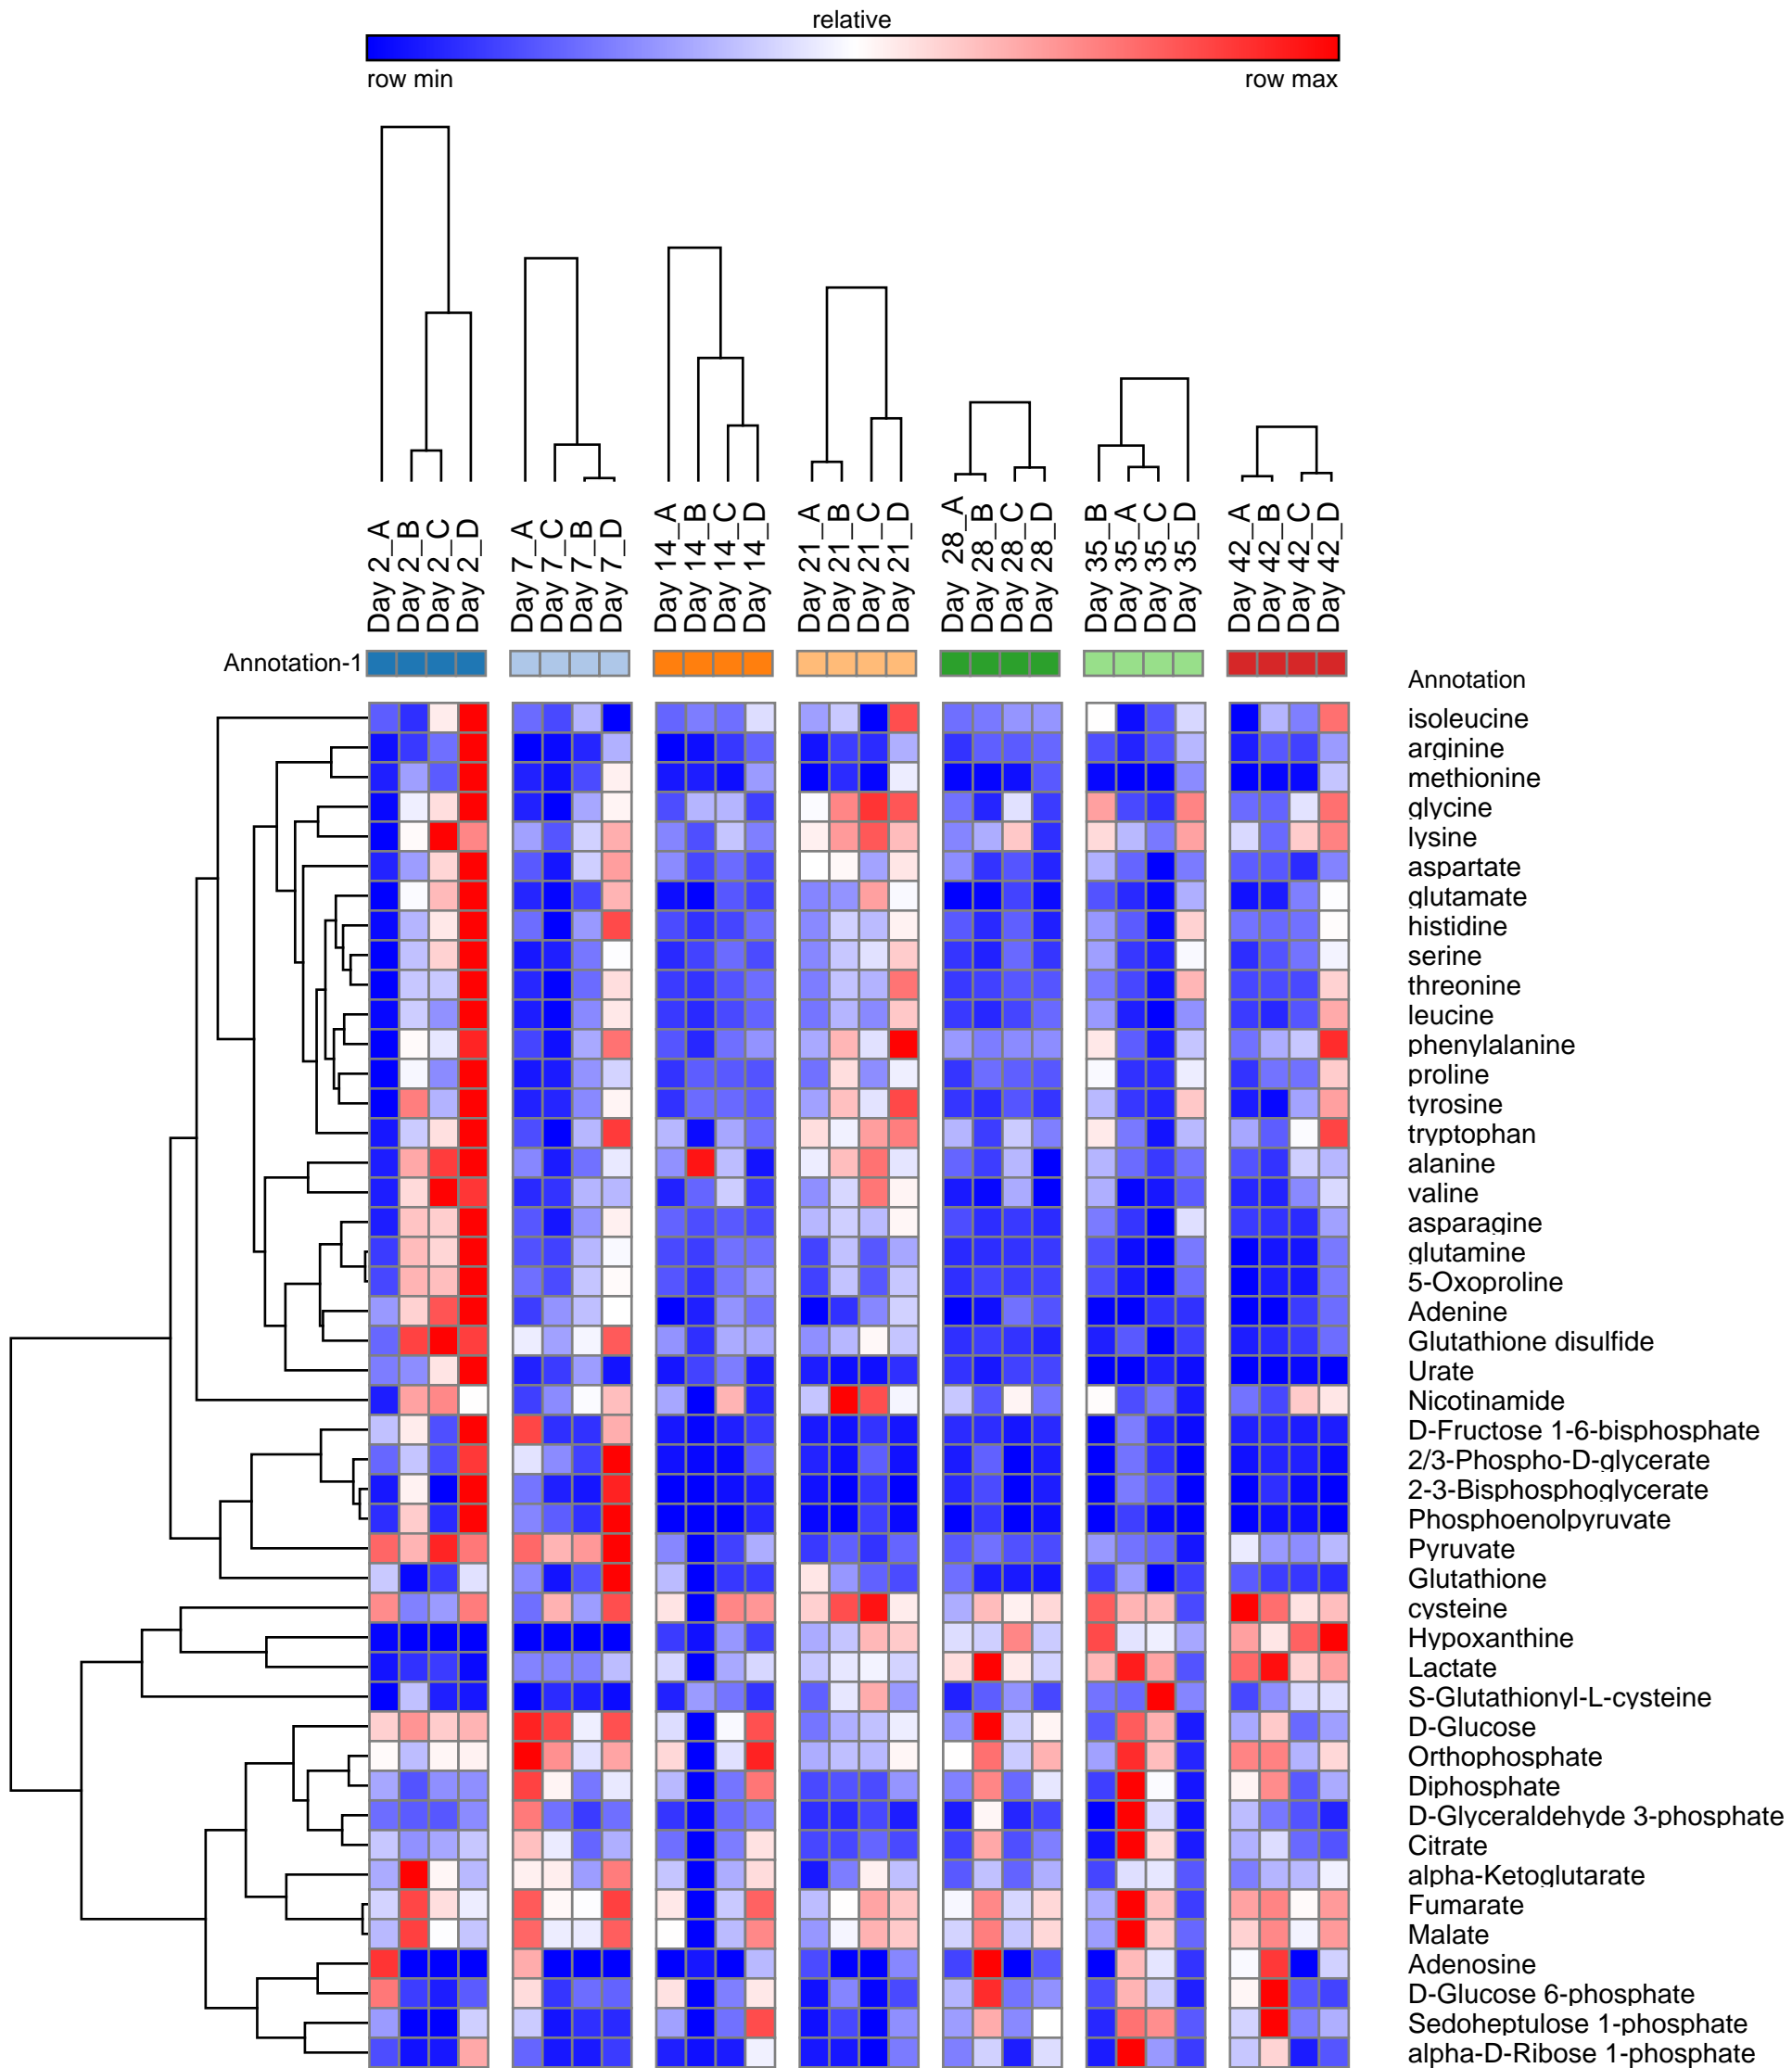

Supplement: NIHMS851367-supplement-Supp_Fig_S1.pdf [file NIHMS851367-supplement-Supp_Fig_S1.pdf]
