# Supplementary material
Source: PubMed Central journal article supplement (PMC5364945)

Annotation-1  
 Sham + MLD POST  
 Sham + MLD PRE  
 Shock + MLD POST  
 Shock + MLD PRE

supplementary Figure 1 - Heat map of Mesenteric Lymph from Rats with trauma and hemorrhage, with and without mesenteric lymph diversion

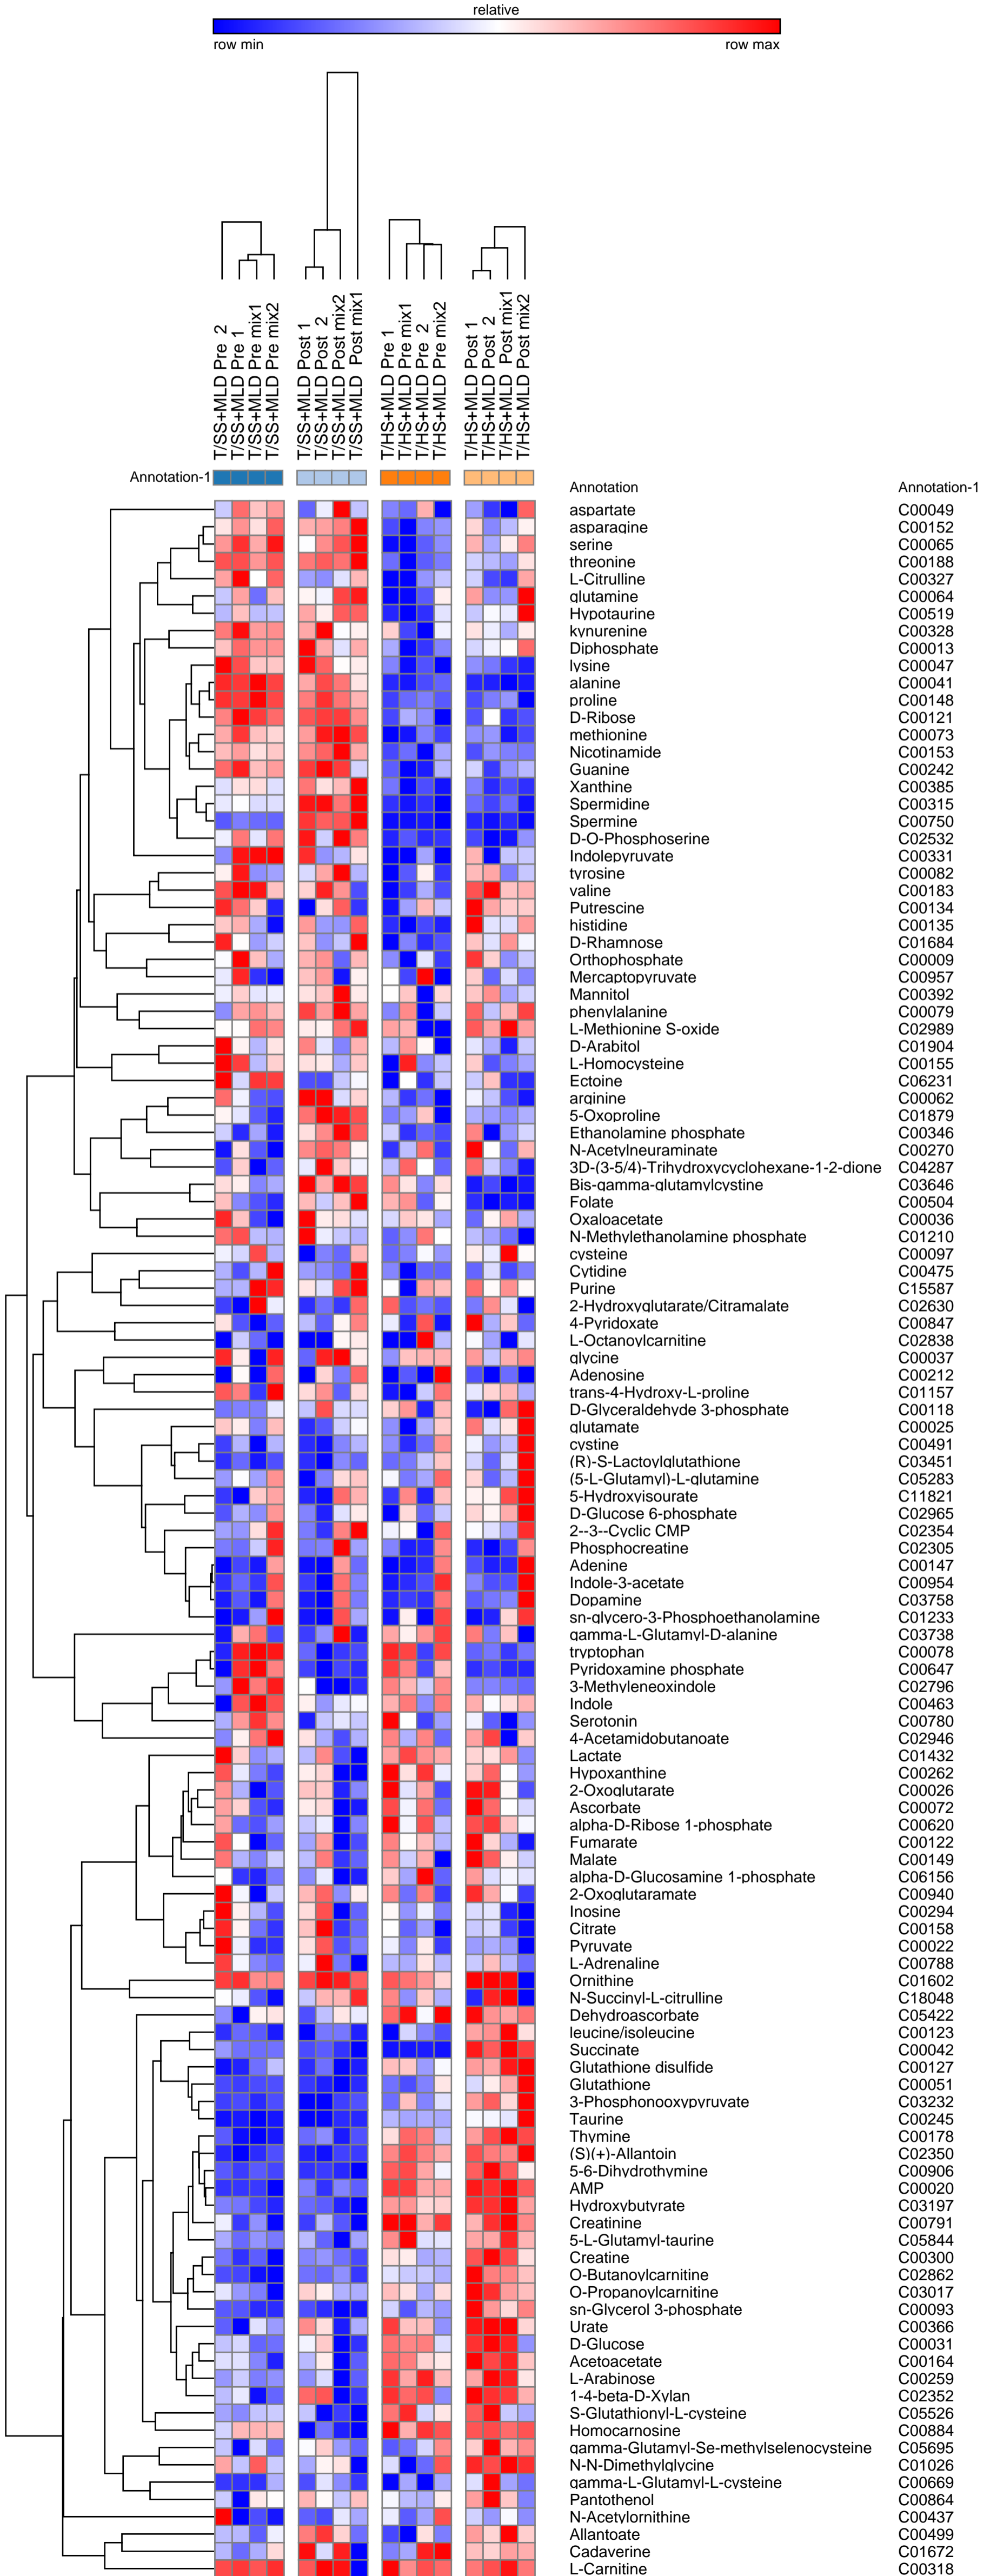

Supplement: NIHMS851367-supplement-Supp_Fig_S3.pdf [file NIHMS851367-supplement-Supp_Fig_S3.pdf]
