# Supplementary material
Source: PubMed Central journal article supplement (PMC5364945)
Supplement: NIHMS851367-supplement-Supp_TableS1.pdf [file NIHMS851367-supplement-Supp_TableS1.pdf]

Supplementary Table 1 - part 1 - C18 3 min Isocratic method - IROA standard characterization

| Compound Name                                                         | PARENT_CID | Neutral mass | Acid Rt | Organic Rt | Polarity |
|-----------------------------------------------------------------------|------------|--------------|---------|------------|----------|
| (2-AMINOETHYL)PHOSPHONATE                                             | C03557     | 125.02418    | 1.21    | 1.19       | POS      |
| (R)-MALATE                                                            | C00711     | 134.02153    | 1.57    | 1.34       | NEG      |
| (R,R)-TARTARIC ACID                                                   | C00898     | 150.01644    | 1.40    | 1.45       | NEG      |
| (S)-LACTATE                                                           | C01432     | 90.03170     | 1.62    | 1.30       | NEG      |
| (S)-MALATE                                                            | C00711     | 134.02153    | 1.57    | 1.34       | NEG      |
| (S)-NICOTINE                                                          | C16150     | 162.11570    | 1.65    | -          | POS      |
| (S,S)-TARTARIC ACID                                                   | C00898     | 150.01644    | 1.40    | 1.45       | NEG      |
| 1,3-DIAMINOPROPANE                                                    | C00986     | 74.08440     | 1.09    | 1.07       | POS      |
| 1-AMINOCYCLOPROPANE-1-CARBOXYLATE                                     | C01234     | 101.04768    | 1.22    | 1.20       | POS      |
| 1-HYDROXY-2-NAPHTHOATE                                                | C03203     | 188.04735    | 1.61    | 1.27       | NEG      |
| 1-METHYL-6,7-DIHYDROXY-1,2,3,4-TETRAHYDROISOQUINOLINE                 | C09642     | 179.09464    | 1.79    | 1.35       | POS      |
| 1-METHYLADENOSINE                                                     | C02494     | 281.11241    | 1.64    | 1.25       | POS      |
| 2',4'-DIHYDROXYACETOPHENONE                                           | C03663     | 152.04735    | 3.15    | -          | POS      |
| 2,4-DIHYDROXYPTERIDINE                                                | C03212     | 164.03343    | 2.09    | 1.26       | NEG      |
| 2,4-DIHYDROXYPYRIMIDINE-5-CARBOXYLIC ACID                             | C03030     | 156.01711    | 1.91    | 1.35       | NEG      |
| 2,5-DIHYDROXYBENZOATE                                                 | C00628     | 154.02661    | 1.99    | 1.26       | NEG      |
| 2,6-DIHYDROXYPYRIDINE                                                 | C03056     | 111.03202    | 1.99    | -          | POS      |
| 2-ACETAMIDO-2-DEOXY-BETA-D-GLUCOSYLAMINE                              | CA1416     | 220.10592    | 1.15    | 1.25       | POS      |
| 2-AMINO-2-METHYLPROPANOATE                                            | C03665     | 103.06333    | 1.23    | 1.22       | POS      |
| 2-AMINOETHYL DIHYDROGEN PHOSPHATE                                     | CA1062     | 141.01910    | 1.21    | 1.19       | POS      |
| 2-AMINOPHENOL                                                         | C01987     | 109.05276    | 1.72    | 1.28       | POS      |
| 2'-DEOXYADENOSINE                                                     | C00559     | 269.11241    | 2.96    | -          | POS      |
| 2'-DEOXYADENOSINE 5'-DIPHOSPHATE                                      | C00206     | 411.03451    | 1.65    | 1.65       | POS      |
| 2'-DEOXYADENOSINE 5'-TRIPHOSPHATE                                     | C00131     | 491.00084    | 1.05    | 1.65       | NEG      |
| 2'-DEOXYCYTIDINE 5'-DIPHOSPHATE                                       | C00705     | 387.02327    | 1.49    | 1.60       | NEG      |
| 2'-DEOXYCYTIDINE 5'-MONOPHOSPHATE                                     | C00239     | 307.05694    | 1.61    | 1.27       | POS      |
| 2-DEOXY-D-GLUCOSE                                                     | C00586     | 164.06848    | 1.25    | 1.20       | POS      |
| 2'-DEOXYGUANOSINE                                                     | C00330     | 285.10732    | 2.50    | 2.49       | POS      |
| 2'-DEOXYGUANOSINE 5'-MONOPHOSPHATE                                    | C00362     | 347.06309    | 1.64    | 1.26       | POS      |
| 2'-DEOXYURIDINE 5'-MONO-PHOS-PHATE                                    | C00365     | 308.04096    | 1.64    | 1.65       | NEG      |
| 2-HYDROXYBUTYRIC ACID                                                 | C05984     | 104.04734    | 1.67    | 2.42       | POS      |
| 2-HYDROXYPHENYLACETIC ACID                                            | CA1444     | 152.04734    | 1.61    | 3.92       | NEG      |
| 2-HYDROXYPYRIDINE                                                     | C02502     | 95.03711     | 2.27    | -          | POS      |
| 2-METHYLMALATE                                                        | C02226     | 130.02661    | 3.53    | 3.52       | NEG      |
| 2-METHYLPROPANAL OXIME                                                | C03219     | 87.06841     | 1.40    | 1.38       | POS      |
| 2-OXOADIPATE                                                          | C00322     | 160.03718    | 2.48    | 2.47       | NEG      |
| 2-QUINOLINECARBOXYLIC ACID                                            | C06325     | 173.04768    | -       | 1.27       | NEG      |
| 3-(4-HYDROXYPHENYL)PYRUVATE                                           | C01179     | 180.04226    | -       | 1.29       | NEG      |
| 3,4-DIHYDROXY-L-PHENYLALANINE                                         | C00355     | 197.06881    | 1.64    | 1.25       | POS      |
| 3,4-DIHYDROXYPHENYL GLYCOL                                            | C05576     | 170.05791    | 1.91    | 1.27       | NEG      |
| 3,4-DIHYDROXYPHENYLACETATE                                            | C01161     | 168.04226    | 2.62    | -          | NEG      |
| 3',5'-CYCLIC AMP                                                      | C00575     | 329.05252    | 2.12    | 1.34       | POS      |
| 3-AMINO-4-HYDROXYBENZOIC ACID                                         | C12115     | 153.04259    | 1.64    | 1.30       | POS      |
| 3-AMINO-5-HYDROXYBENZOIC ACID                                         | C12107     | 153.04260    | 1.71    | 1.25       | POS      |
| 3-AMINOISOBUTANOATE                                                   | C05145     | 103.06333    | 1.25    | 1.22       | POS      |
| 3'-CMP                                                                | C05822     | 323.05186    | 1.64    | 1.26       | POS      |
| 3-DEHYDROSHIKIMATE                                                    | C02637     | 172.03717    | 1.64    | 1.35       | NEG      |
| 3-HYDROXY-3-METHYLGLUTARATE                                           | C03761     | 162.05283    | 2.18    | 2.19       | NEG      |
| 3-HYDROXYANTHRANILATE                                                 | C00632     | 153.04259    | 1.23    | 1.22       | NEG      |
| 3-HYDROXYBENZOATE                                                     | C00587     | 138.03170    | 3.22    | -          | NEG      |
| 3-HYDROXYKYNURENINE                                                   | C02794     | 224.07971    | 1.93    | 1.26       | POS      |
| 3-HYDROXYPHENYLACETATE                                                | C05593     | 152.04735    | 3.23    | -          | POS      |
| 3-METHOXY-4-HYDROXYMANDELATE                                          | C05584     | 198.05283    | 3.22    | 3.25       | NEG      |
| 3-METHOXYTYRAMINE                                                     | C05587     | 167.09464    | -       | 2.51       | NEG      |
| 3-METHYLADENINE                                                       | C00913     | 149.07015    | 1.64    | 1.32       | POS      |
| 3-METHYLHISTAMINE                                                     | C15526     | 125.09530    | 1.10    | 1.07       | POS      |
| 3-NITRO-L-TYROSINE-change Rt                                          | CA1195     | 226.05897    | -       | 2.65       | NEG      |
| 3-SULFINO-L-ALANINE                                                   | C00606     | 153.00958    | 1.26    | 1.32       | POS      |
| 3-UREIDOPROPIONATE                                                    | C02642     | 132.05349    | 1.64    | 1.25       | POS      |
| 4-ACETAMIDOBUTANOATE                                                  | C02946     | 145.07389    | 2.29    | 1.33       | POS      |
| 4-AMINOBUTANOATE                                                      | C00334     | 103.06333    | 1.19    | 1.18       | POS      |
| 4-GUANIDINOBUTANOATE                                                  | C01035     | 145.08513    | 1.64    | 1.26       | POS      |
| 4-HYDROXY-2-QUINOLINECARBOXYLIC ACID                                  | C01717     | 189.04259    | 3.26    | 1.25       | POS      |
| 4-HYDROXYBENZOATE                                                     | C00156     | 138.03170    | 1.54    | 1.27       | NEG      |
| 4-HYDROXY-L-PHENYLGLYCINE                                             | CA1445     | 167.05824    | 1.27    | 1.24       | POS      |
| 4-HYDROXY-L-PROLINE                                                   | C01157     | 131.05824    | 1.23    | 1.20       | POS      |
| 4-IMIDAZOLEACETIC ACID                                                | C02835     | 126.04293    | 1.24    | 1.21       | POS      |
| 4-METHYLCATECHOL                                                      | C06730     | 124.05243    | 3.20    | -          | POS      |
| 4-PYRIDOXATE                                                          | C00847     | 183.05316    | 2.49    | 1.26       | POS      |
| 4-QUINOLINECARBOXYLIC ACID                                            | C06414     | 173.04768    | 2.13    | 2.11       | POS      |
| 5,6-DIHYDROURACIL                                                     | C00429     | 114.04293    | 1.64    | 1.25       | POS      |
| 5-AMINOIMIDAZOLE-4-CARBOXAMIDE-1-BETA-D-RIBOFURANOSYL 5'-MONOPHOSPHAT | C04677     | 338.06275    | 1.63    | 1.26       | POS      |

|                                                             |        |           |      |      |     |
|-------------------------------------------------------------|--------|-----------|------|------|-----|
| 5-AMINOLEVULINIC ACID                                       | C00430 | 131.05824 | 1.22 | 1.19 | POS |
| 5-AMINOPENTANOATE                                           | C00431 | 117.07898 | 1.31 | 1.24 | POS |
| 5'-DEOXYADENOSINE                                           | C05198 | 251.10184 | 2.86 | 1.24 | POS |
| 5-HYDROXYINDOLEACETATE                                      | C05635 | 191.05824 | 1.22 | -    | POS |
| 5-HYDROXY-L-TRYPTOPHAN                                      | C01017 | 220.08479 | 2.93 | 1.25 | POS |
| 5-HYDROXYMETHYLURACIL                                       | C03088 | 142.03784 | 1.64 | 1.26 | NEG |
| 5-METHYLCYTOSINE HYDROCHLORIDE                              | C02376 | 125.05891 | 1.29 | 1.23 | POS |
| 5'-METHYLTHIOADENOSINE                                      | C00170 | 297.08956 | 1.86 | 1.25 | NEG |
| 5-OXO-D-PROLINE                                             | C01879 | 129.04259 | 1.74 | 1.26 | NEG |
| 5-OXO-L-PROLINE                                             | C01879 | 129.04259 | 1.74 | 1.26 | NEG |
| 5-VALEROLACTONE                                             | C02240 | 100.05243 | 3.33 | -    | POS |
| 6-DEOXY-L-GALACTOSE                                         | C00382 | 164.06848 | 1.55 | 1.57 | NEG |
| 6-HYDROXYDOPAMINE                                           | CA1404 | 169.07390 | 1.64 | 1.24 | POS |
| 6-HYDROXYNICOTINATE                                         | C01020 | 139.02694 | 2.50 | 2.55 | POS |
| 6-PHOSPHOGLUCONIC ACID                                      | C00345 | 276.02464 | 1.50 | 1.60 | NEG |
| ADENINE                                                     | C00147 | 135.05450 | 1.63 | 1.24 | POS |
| ADENOSINE                                                   | C00212 | 267.09676 | 1.91 | 1.25 | POS |
| ADENOSINE 2',3'-CYCLIC MONOPHOSPHATE                        | C02353 | 267.09676 | 1.66 | 1.32 | POS |
| ADENOSINE 3',5'-CYCLIC MONOPHOSPHATE                        | C00575 | 329.05252 | 2.12 | 1.34 | POS |
| ADENOSINE 3',5'-DIPHOSPHATE                                 | C00054 | 427.02942 | 2.20 | -    | POS |
| ADENOSINE 5'-DIPHOSPHATE                                    | C00008 | 427.02942 | 1.50 | 1.58 | POS |
| ADENOSINE 5'-DIPHOSPHORIBOSE                                | C00301 | 559.07168 | 1.63 | 1.86 | NEG |
| ADENOSINE 5'-MONOPHOSPHATE                                  | C00020 | 347.06309 | 1.64 | 1.27 | POS |
| ADENOSINE-5'-DIPHOSPHOGLUCOSE                               | C00498 | 427.02942 | 1.63 | -    | NEG |
| AGMATINE SULFATE                                            | C00179 | 130.12180 | 1.11 | 1.07 | POS |
| ALLANTOIN                                                   | C01551 | 158.04399 | 1.28 | 1.26 | NEG |
| ALPHA-AMINOADIPATE                                          | C00956 | 161.06881 | 1.27 | 1.23 | POS |
| ALPHA-D-GALACTOSE 1-PHOSPHATE                               | C00446 | 260.02971 | 1.27 | 1.29 | NEG |
| ALPHA-D-GLUCOSE 1-PHOSPHATE                                 | C00103 | 260.02972 | 1.27 | 1.29 | POS |
| ALPHA-KETOGLUTARIC ACID                                     | C00026 | 146.02153 | 1.93 | 1.89 | NEG |
| ANILINE                                                     | C00292 | 93.05785  | 2.24 | 2.25 | POS |
| ANILINE-2-SULFONIC ACID                                     | C00292 | 173.01467 | 2.24 | 2.25 | POS |
| ASCORBATE                                                   | C00072 | 176.03209 | 1.62 | 1.25 | NEG |
| AZELAIC ACID                                                | C08261 | 188.10486 | -    | 1.26 | NEG |
| BENZOATE                                                    | C00180 | 122.03678 | 1.99 | 1.32 | NEG |
| BETA-ALANINE                                                | C00099 | 89.04768  | 1.18 | 1.16 | POS |
| BETAINE                                                     | C00719 | 117.07898 | 1.24 | 1.21 | POS |
| BETA-NICOTINAMIDE ADENINE DINUCLEOTIDE 2'-PHOSPHATE REDUCED | C00006 | 743.07545 | 1.64 | 1.64 | POS |
| BETA-NICOTINAMIDE ADENINE DINUCLEOTIDE PHOSPHATE            | C00006 | 743.07545 | 1.64 | 1.64 | POS |
| BIS(3-AMINOPROPYL)AMINE                                     | C03375 | 131.14225 | 1.03 | 1.02 | POS |
| BUTANAL                                                     | C01412 | 72.05752  | 2.65 | -    | POS |
| CADAVERINE                                                  | C01672 | 102.11570 | 1.08 | 1.07 | POS |
| CARNOSINE                                                   | C00386 | 226.10659 | 1.10 | 1.10 | POS |
| CHOLINE                                                     | C00114 | 104.10754 | 1.19 | 1.15 | POS |
| CIS-4-HYDROXY-D-PROLINE                                     | C01015 | 131.05824 | 1.21 | 1.19 | POS |
| CITRAMALATE                                                 | C00815 | 148.11402 | 1.99 | 2.04 | NEG |
| CITRATE                                                     | C00158 | 192.02701 | 1.74 | 1.80 | NEG |
| CITRULLINE                                                  | C00327 | 175.09569 | 1.21 | 1.19 | POS |
| CMP                                                         | C00055 | 323.05186 | 1.29 | 1.22 | POS |
| CREATINE                                                    | C00300 | 131.06948 | 1.26 | 1.21 | POS |
| CREATINE PHOSPHATE                                          | C02305 | 211.03581 | 1.31 | 1.27 | POS |
| CREATININE                                                  | C00791 | 113.05891 | 1.22 | 1.19 | POS |
| CYS-GLY                                                     | C01419 | 178.04122 | 1.13 | 1.11 | POS |
| CYSTEAMINE                                                  | C01678 | 77.02992  | 1.08 | 1.08 | POS |
| CYTIDINE                                                    | C00475 | 243.08552 | 1.61 | 1.25 | POS |
| CYTIDINE 2',3'-CYCLIC MONO-PHOS-PHATE                       | C02354 | 305.04129 | 1.34 | 1.23 | POS |
| CYTIDINE 5'-DIPHOSPHATE                                     | C00112 | 403.01819 | 1.47 | 1.54 | NEG |
| CYTIDINE 5'-DIPHOSPHOCHOLINE                                | C00307 | 489.11459 | 1.23 | 1.20 | POS |
| CYTOSINE                                                    | C00380 | 111.04326 | 1.61 | 1.24 | POS |
| D-(-)-3-PHOSPHOGLYCERIC ACID                                | C00597 | 185.99294 | 1.30 | 2.00 | POS |
| D-(+)-CELLOBIOSE                                            | C00185 | 342.11622 | 1.21 | -    | POS |
| D-(+)-GALACTOSAMINE                                         | C02262 | 179.07938 | 1.24 | 1.13 | POS |
| D-(+)-GLUCOSAMINE                                           | C00329 | 179.07938 | 1.16 | 1.13 | POS |
| D-(+)-RAFFINOSE                                             | C00492 | 594.22187 | 1.27 | -    | POS |
| D-ALANINE                                                   | C01401 | 89.04768  | 1.22 | 1.19 | POS |
| DAMP                                                        | C00360 | 331.06817 | 1.64 | 1.26 | POS |
| D-ASPARTATE                                                 | C16433 | 133.03751 | 1.22 | 1.20 | POS |
| DEHYDROASCORBATE                                            | C00425 | 174.01644 | 1.26 | -    | POS |
| DEHYDRO-L-(+)-ASCORBIC ACID DIMER                           | C00425 | 348.03288 | 1.26 | -    | POS |
| DEOXYCARNITINE                                              | C05543 | 145.11028 | 1.24 | 1.21 | POS |
| DEOXYCYTIDINE                                               | C00881 | 227.09061 | 1.64 | 1.24 | POS |
| DEOXYURIDINE                                                | C00526 | 228.07462 | 2.13 | 1.27 | NEG |
| D-FRUCTOSE                                                  | C01496 | 180.06339 | 1.23 | -    | NEG |
| D-FRUCTOSE 6-PHOSPHATE                                      | C00085 | 260.02972 | 1.28 | 1.29 | NEG |
| D-GALACTOSE                                                 | C01582 | 180.06339 | 1.23 | -    | NEG |

|                                           |        |           |      |      |     |
|-------------------------------------------|--------|-----------|------|------|-----|
| D-GLUCONATE                               | C00257 | 178.04774 | 1.23 | 1.22 | POS |
| D-GLUCONO-1,5-LACTONE                     | C00198 | 178.04774 | 1.37 | 1.26 | NEG |
| D-GLUCOSAMINE 6-PHOSPHATE                 | C00352 | 259.04571 | 1.20 | 1.17 | POS |
| D-GLUCOSAMINE 6-SULFATE                   | CA1422 | 259.03619 | 1.21 | 1.19 | NEG |
| D-GLUCOSE 6-PHOSPHATE                     | C00092 | 260.02972 | 1.26 | 1.28 | NEG |
| D-GLUCOSE-6-PHOSPHATE                     | C00092 | 260.02972 | 1.26 | 1.28 | NEG |
| D-GLUCURONIC ACID                         | C00191 | 194.04265 | 1.23 | 1.25 | NEG |
| D-GLUCURONOLACTONE                        | C02670 | 176.03209 | 1.35 | 1.26 | NEG |
| D-GLYCERIC ACID                           | C00258 | 106.02661 | 1.36 | 1.24 | NEG |
| D-GULONIC ACID GAMA-LACTONE               | C00800 | 178.04774 | 1.25 | 1.25 | POS |
| DIETHANOLAMINE                            | C06772 | 105.07898 | 1.17 | 1.14 | POS |
| DIETHYL 2-METHYL-3-OXOSUCCINATE           | C04067 | 202.08413 | -    | 1.26 | NEG |
| DIHYDROXYACETONE PHOSPHATE                | C00111 | 182.01439 | 1.20 | 1.28 | NEG |
| DIHYDROXYMANDELIC ACID                    | C07470 | 184.03718 | 1.97 | 1.93 | NEG |
| DIMETHYLBENZIMIDAZOLE                     | C03114 | 146.0844  | -    | 1.27 | NEG |
| DL-5-HYDROXYLYSINE                        | C01211 | 162.10044 | 1.10 | 1.10 | NEG |
| D-LACTOSE                                 | C00243 | 360.12678 | 1.13 | 1.12 | NEG |
| DL-NORMETANEPHRINE                        | CA1379 | 183.08954 | 1.64 | 1.24 | POS |
| D-MANNOSAMINE                             | C03570 | 179.07938 | 1.15 | 1.14 | POS |
| D-MANNOSE 6-PHOSPHATE                     | C00275 | 260.02972 | 1.25 | 1.24 | POS |
| DOPAMINE                                  | C03758 | 153.07898 | 1.66 | 1.25 | POS |
| D-ORNITHINE                               | C00515 | 132.08987 | 1.11 | 1.11 | POS |
| D-PANTOTHENIC ACID                        | C00864 | 219.11067 | -    | 2.63 | POS |
| D-RIBOSE                                  | C08353 | 150.05283 | 1.26 | 1.28 | NEG |
| D-RIBOSE 5-PHOSPHATE                      | C00117 | 230.01916 | 1.27 | 1.29 | NEG |
| D-RIBULOSE 1,5-BISPHOSPHATE               | C01182 | 309.98548 | 2.19 | 1.51 | NEG |
| D-SACCHARIC ACID                          | C00818 | 210.03757 | 1.28 | 1.28 | NEG |
| D-TAGATOSE                                | C00795 | 180.06339 | 1.23 | 1.25 | NEG |
| D-TRYPTOPHAN                              | C00806 | 204.08988 | 3.41 | 3.34 | POS |
| D-XYLOSE                                  | C01394 | 150.05283 | 1.26 | 1.25 | NEG |
| EPINEPHRINE                               | C00788 | 183.08954 | 1.35 | 1.26 | POS |
| ERYTHRITOL                                | C00503 | 122.05791 | 1.25 | -    | POS |
| ETHANOLAMINE PHOSPHATE                    | C00346 | 141.01910 | 1.21 | 1.19 | POS |
| ETHYL 3-UREIDOPROPIONATE                  | CA1359 | 160.08479 | 1.43 | 1.54 | POS |
| FORMYL-L-METHIONYL PEPTIDE                | C03145 | 177.04597 | 1.18 | 1.25 | NEG |
| FRUCTOSE 1,6-BIPHOSPHATE                  | C00354 | 339.99606 | 2.00 | 1.50 | NEG |
| FUMARATE                                  | C00122 | 116.01096 | 2.18 | 2.19 | NEG |
| GALACTARATE                               | C01807 | 210.03757 | 1.28 | 1.29 | NEG |
| GALACTITOL                                | C01697 | 182.07904 | 1.21 | 1.25 | NEG |
| GLUCONIC ACID                             | CA1492 | 196.05830 | 1.26 | 1.25 | NEG |
| GLUCOSAMINATE                             | C03752 | 195.07429 | 1.19 | 1.16 | POS |
| GLUTARATE                                 | C00489 | 132.04226 | 2.94 | 2.90 | NEG |
| GLUTARIC ACID                             | C00489 | 132.04226 | 2.94 | 2.90 | NEG |
| GLUTATHIONE                               | C00051 | 307.08381 | 1.64 | 1.24 | POS |
| GLYCERALDEHYDE                            | C02154 | 90.03170  | 1.21 | -    | POS |
| GLYCERALDEHYDE 3-PHOSPHATE DIETHYL ACETAL | CA1402 | 169.99803 | 1.20 | 1.32 | NEG |
| GLYCERATE                                 | C00258 | 106.02661 | 1.36 | 1.24 | NEG |
| GLYCEROL 2-PHOSPHATE                      | C02979 | 172.01367 | 1.30 | 1.30 | NEG |
| GLYCINE                                   | C00037 | 75.03203  | 1.18 | 1.17 | POS |
| GUANIDINOACETATE                          | C00581 | 117.05383 | 1.20 | 1.19 | POS |
| GUANINE                                   | C00242 | 151.04941 | 2.23 | -    | POS |
| GUANOSINE                                 | C00387 | 283.09167 | 2.22 | 1.25 | POS |
| GUANOSINE 3',5'-CYCLIC MONOPHOSPHATE      | C00942 | 345.04744 | 2.52 | 2.57 | POS |
| GUANOSINE 5'-DIPHOSPHATE                  | C00035 | 443.02432 | 2.25 | -    | POS |
| GUANOSINE 5'-DIPHOSPHO-D-MANNOSE          | C00096 | 605.07716 | 1.63 | 1.63 | POS |
| GUANOSINE 5'-DIPHOSPHOGLUCOSE             | C00394 | 443.02432 | 1.65 | 1.65 | POS |
| GUANOSINE 5'-MONOPHOSPHATE                | C00144 | 363.05800 | 1.64 | 1.63 | POS |
| HEPTANOIC ACID                            | CA1393 | 130.09938 | -    | 1.25 | NEG |
| HEXANOATE                                 | C01585 | 116.08373 | -    | 1.25 | NEG |
| HISTAMINE                                 | C00388 | 111.07965 | 1.09 | 1.07 | POS |
| HOMOCYSTEINE                              | C05330 | 135.03540 | 1.34 | 1.26 | POS |
| HOMOCYSTINE                               | C01817 | 268.05515 | 1.31 | 1.24 | POS |
| HOMOGENISATE                              | C00544 | 168.04226 | 2.50 | 3.25 | NEG |
| HOMOSERINE                                | C00263 | 119.05824 | 1.19 | 1.19 | POS |
| HYPOTAURINE                               | C00519 | 109.01975 | 1.22 | 1.19 | POS |
| HYPOXANTHINE                              | C00262 | 136.03851 | 1.67 | 1.25 | POS |
| INDOLE-3-ACETALDEHYDE                     | C00637 | 159.06841 | -    | 1.34 | NEG |
| INDOXYL SULFATE                           | C08481 | 133.05277 | 1.64 | 1.24 | POS |
| INOSINE                                   | C00294 | 268.08077 | 2.22 | 1.26 | POS |
| INOSINE 5'-DIPHOSPHATE                    | C00104 | 428.01344 | 2.34 | -    | POS |
| INOSINE 5'-MONOPHOSPHATE                  | C00130 | 348.04710 | 1.64 | 1.69 | NEG |
| INOSINE 5'-PHOSPHATE                      | C00130 | 348.04710 | 1.64 | 1.69 | NEG |
| ISOCITRIC ACID                            | C00311 | 192.02701 | 1.61 | 1.34 | NEG |
| ISOPENTENYL PYROPHOSPHATE                 | C00129 | 297.08547 | 1.15 | -    | POS |
| ITACONATE                                 | C00490 | 130.02661 | 3.70 | -    | NEG |

|                                   |        |           |      |      |     |
|-----------------------------------|--------|-----------|------|------|-----|
| KYNURENINE                        | C01718 | 208.08479 | 3.32 | 1.31 | POS |
| L-2,3-DIAMINOPROPIONIC ACID       | C03401 | 104.05858 | 1.12 | 1.12 | POS |
| L-ALANINE                         | C01401 | 89.04768  | 1.22 | 1.19 | POS |
| L-ALLOTHREONINE                   | C05519 | 119.05824 | 1.21 | 1.18 | POS |
| L-ANSERINE                        | C01262 | 303.11788 | -    | 1.12 | NEG |
| L-ARABITOL                        | CA1387 | 152.06848 | -    | 1.25 | NEG |
| L-ARGININE                        | C00062 | 174.11168 | 1.13 | 1.12 | POS |
| L-ASPARAGINE                      | C16438 | 132.05349 | 1.20 | 1.18 | POS |
| L-ASPARTATE                       | C16433 | 133.03751 | 1.22 | 1.20 | POS |
| L-CARNITINE                       | C00318 | 161.10519 | 1.20 | 1.19 | POS |
| L-CYSTATHIONINE                   | C00542 | 222.06743 | 1.16 | 1.16 | POS |
| L-CYSTEIC ACID                    | C00506 | 187.01506 | 1.15 | 1.43 | NEG |
| L-CYSTEINE                        | C00736 | 121.01975 | 1.25 | 1.25 | POS |
| L-CYSTINE                         | C01420 | 240.02385 | 1.18 | 1.17 | POS |
| LEUCINE                           | C16439 | 131.09463 | 1.99 | 1.26 | POS |
| L-GLUTAMIC ACID                   | C00302 | 147.05316 | 1.21 | 1.20 | POS |
| L-GLUTAMINE                       | C00303 | 146.06914 | 1.24 | 1.20 | POS |
| L-HISTIDINE                       | C00135 | 155.06947 | 1.14 | 1.12 | POS |
| L-HISTIDINOL                      | C00860 | 141.09021 | 1.10 | 1.07 | POS |
| L-HOMOCYSTEINE THIOACTONE         | CE1401 | 117.02483 | 1.30 | 1.24 | POS |
| L-ISOLEUCINE                      | C16434 | 131.09463 | 1.40 | 1.24 | POS |
| L-KYNURENINE                      | C01718 | 208.08479 | 3.32 | 1.31 | POS |
| LL-2,6-DIAMINOHEPTANEDIOATE       | C00666 | 190.09536 | 1.16 | 1.14 | POS |
| L-LYSINE                          | C16440 | 146.10553 | 1.12 | 1.11 | POS |
| L-METHIONINE                      | C01733 | 149.05105 | 1.61 | 1.26 | NEG |
| L-METHIONINE SULFOXIMINE          | C03510 | 180.05687 | 1.19 | 1.17 | POS |
| L-NORVALINE                       | CA1395 | 117.07898 | 1.63 | 1.26 | POS |
| L-ORNITHINE                       | C00077 | 132.08987 | 1.10 | 1.11 | POS |
| L-PHENYLALANINE                   | C02057 | 165.07898 | 3.17 | 1.42 | POS |
| L-PIPECOLIC ACID                  | C00408 | 129.07898 | 1.09 | 1.11 | POS |
| L-PROLINE                         | C16435 | 115.06333 | 1.26 | 1.23 | POS |
| L-RHAMNOSE                        | C00507 | 182.07904 | 1.25 | 1.20 | NEG |
| L-SERINE                          | C00716 | 105.04259 | 1.19 | 1.17 | POS |
| L-SORBOSE                         | C01452 | 180.06339 | 1.04 | 1.25 | NEG |
| L-THREONINE                       | CA1381 | 119.05824 | 1.22 | 1.19 | POS |
| L-TRYPTOPHAN                      | C00806 | 204.08988 | 3.41 | 3.34 | POS |
| L-TRYPTOPHANAMIDE                 | C00977 | 203.10586 | 1.25 | 1.33 | POS |
| L-TYROSINE                        | C01536 | 181.07389 | 1.92 | 1.26 | POS |
| LUMICHROME                        | C01727 | 242.08038 | 1.11 | -    | POS |
| L-VALINE                          | C16436 | 117.07898 | 1.36 | 1.26 | POS |
| MALEAMATE                         | C01596 | 115.02694 | 1.36 | -    | NEG |
| MALEIC ACID                       | C01384 | 116.01096 | 2.51 | 2.48 | NEG |
| MALEIMIDE                         | C07272 | 97.01638  | 1.69 | -    | POS |
| MALTOSE                           | C00208 | 342.11622 | 1.24 | 1.26 | NEG |
| MANDELIC ACID                     | CA1444 | 152.04734 | 1.61 | 3.92 | NEG |
| MANNITOL                          | C00392 | 182.07904 | 1.24 | 1.25 | POS |
| MANNOSE                           | C00159 | 180.06339 | 1.23 | 1.24 | NEG |
| MELIBIOSE                         | C05402 | 342.11622 | 1.24 | 1.25 | NEG |
| MERCAPTOPYRUVATE                  | C00957 | 119.98812 | -    | 1.65 | NEG |
| MESO-TARTARIC ACID                | C00552 | 168.02701 | 1.64 | -    | NEG |
| MESOXALATE                        | C00830 | 117.99023 | 1.61 | -    | NEG |
| METHYL BETA-D-GALACTOSIDE         | C03619 | 194.07904 | 2.09 | 1.33 | NEG |
| METHYL INDOLE-3-ACETATE           | CA1231 | 189.07898 | 3.01 | -    | POS |
| METHYLGUANIDINE                   | C02294 | 73.06400  | 1.22 | 1.19 | POS |
| METHYLMALONATE                    | C02170 | 118.02661 | 2.43 | 2.37 | NEG |
| MEVALOLACTONE                     | CA1383 | 130.06300 | 2.41 | 2.42 | POS |
| MONO-METHYL GLUTARATE             | CA1015 | 146.05791 | -    | 2.05 | NEG |
| MYO-INOSITOL                      | C00137 | 180.06339 | 1.22 | 1.25 | NEG |
| N(PAI)-METHYL-L-HISTIDINE         | C01152 | 169.08513 | 1.15 | 1.12 | POS |
| N,N-DIMETHYL-1,4-PHENYLENEDIAMINE | C04203 | 136.10005 | 1.64 | 1.33 | POS |
| N1-ACETYLSPERMINE                 | C02567 | 244.22631 | 1.09 | 1.03 | POS |
| N-ACETYL-D-GALACTOSAMINE          | C01074 | 221.08994 | 1.25 | 1.23 | POS |
| N-ACETYL-DL-GLUTAMIC ACID         | CA1454 | 189.06372 | 1.86 | 1.26 | NEG |
| N-ACETYL-DL-METHIONINE            | CA1210 | 191.06162 | 3.02 | 2.97 | POS |
| N-ACETYL-DL-SERINE                | CA1449 | 147.05316 | 1.56 | 1.27 | NEG |
| N-ACETYL-D-MANNOSAMINE            | C00645 | 221.08994 | 1.26 | 1.23 | POS |
| N-ACETYLGLYCINE                   | CA1212 | 117.04259 | 1.64 | 1.26 | NEG |
| N-ACETYL-L-ALANINE                | CE1554 | 131.05824 | 1.99 | 1.37 | NEG |
| N-ACETYL-L-ASPARTIC ACID          | CA1200 | 175.04807 | 1.65 | 1.52 | NEG |
| N-ACETYL-L-CYSTEINE               | CE1310 | 162.02249 | 2.65 | 2.66 | NEG |
| N-ACETYL-L-PHENYLALANINE          | C03519 | 207.08954 | 1.32 | -    | POS |
| N-ACETYLNEURAMINATE               | C00270 | 309.10598 | 1.30 | 1.31 | POS |
| N-ACETYLPUTRESCINE                | C02714 | 130.11061 | 1.27 | 1.23 | POS |
| NAD                               | C00003 | 663.10912 | 1.64 | 1.24 | POS |
| N-ALPHA-ACETYL-L-ASPARAGINE       | CA1214 | 174.06406 | 1.44 | 1.26 | NEG |

|                                               |        |           |      |      |     |
|-----------------------------------------------|--------|-----------|------|------|-----|
| NALPHA-ACETYL-L-LYSINE                        | CA1219 | 188.11609 | 1.27 | 1.22 | POS |
| N-AMIDINO-L-ASPARTATE                         | C03139 | 175.05931 | 1.24 | 1.21 | POS |
| NEPSILON,NEPSILON,NEPSILON-TRIMETHYLLYSINE    | C03793 | 188.15248 | 1.12 | 1.12 | POS |
| N-FORMYLGLYCINE                               | CA1268 | 103.02694 | 1.34 | 1.34 | POS |
| NICOTINAMIDE                                  | C00153 | 122.04801 | 1.64 | 1.26 | POS |
| NICOTINAMIDE HYPOXANTHINE DINUCLEOTIDE        | C04423 | 665.10040 | 1.64 | 1.30 | POS |
| NICOTINAMIDE MONONUCLEOTIDE                   | C00455 | 334.05661 | 1.26 | 1.23 | POS |
| NICOTINATE                                    | C00253 | 123.03203 | 1.63 | 1.37 | POS |
| NICOTINIC ACID ADENINE DINUCLEOTIDE PHOSPHATE | C13051 | 745.06677 | 1.64 | 1.69 | POS |
| N-METHYL-D-ASPARTIC ACID                      | C12269 | 147.05316 | 1.24 | 1.22 | POS |
| N-METHYL-L-GLUTAMATE                          | C01046 | 161.06881 | 1.24 | 1.22 | POS |
| NORADRENALINE                                 | C00547 | 169.07389 | 1.25 | 1.22 | POS |
| NORLEUCINE                                    | C01933 | 131.09463 | 2.10 | 1.27 | POS |
| O-ACETYL-L-SERINE                             | C00979 | 147.05316 | 1.27 | 1.24 | POS |
| OCTOPAMINE                                    | C04227 | 153.07897 | 1.35 | 1.26 | POS |
| O-PHOSPHO-DL-SERINE                           | CA1209 | 185.00893 | 1.26 | 1.36 | NEG |
| O-PHOSPHO-L-SERINE                            | CA1388 | 185.00893 | 1.26 | 1.34 | NEG |
| OPHTHALMIC ACID                               | CA1475 | 289.12739 | 1.64 | 1.26 | POS |
| OROTATE                                       | C00295 | 156.01711 | 1.14 | -    | POS |
| OROTIC ACID                                   | C00295 | 174.02767 | 1.14 | -    | POS |
| OXALIC ACID                                   | C00209 | 126.01644 | 1.07 | -    | POS |
| OXALOMALIC ACID                               | C01990 | 206.00627 | 1.27 | -    | NEG |
| PARAXANTHINE                                  | C13747 | 180.06473 | 3.87 | 1.35 | POS |
| PENTANOATE                                    | C00803 | 102.06808 | -    | 1.30 | NEG |
| PHENETHYLAMINE                                | C05332 | 121.08915 | -    | 1.27 | NEG |
| PHENOL                                        | C00146 | 94.04187  | 2.67 | -    | POS |
| PHENYLETHANOLAMINE                            | C02735 | 137.08406 | 2.66 | -    | POS |
| PHENYLPIRUVATE                                | C00166 | 164.04735 | 1.96 | 1.29 | POS |
| PHOSPHO(ENOL)PYRUVIC ACID                     | C00074 | 167.98238 | 1.35 | 1.35 | POS |
| PHOSPHOCHOLINE                                | C00588 | 183.06604 | 1.21 | 1.19 | POS |
| PHOSPHOCREATINE                               | C02305 | 211.03581 | 1.31 | 1.27 | POS |
| PHOSPHONOACETATE                              | C05682 | 139.98746 | 1.36 | 1.45 | NEG |
| PICOLINIC ACID                                | C10164 | 123.03203 | 1.63 | 1.27 | POS |
| PIPECOLATE                                    | C00408 | 129.07898 | 1.09 | 1.11 | POS |
| PROPANOATE                                    | C00163 | 74.03678  | 3.00 | 1.37 | POS |
| PROPIONATE                                    | C00163 | 74.03678  | 3.00 | 1.37 | POS |
| PTERIN                                        | CA1303 | 163.04941 | 1.37 | -    | NEG |
| PURINE                                        | C00465 | 120.04360 | 1.85 | 1.25 | POS |
| PUTRESCINE                                    | C00134 | 88.10005  | 1.06 | 1.07 | POS |
| PYRIDINE-2,3-DICARBOXYLATE                    | C03722 | 167.02186 | 1.87 | 1.95 | NEG |
| PYRIDOXAL                                     | C00250 | 167.05824 | 1.63 | 1.33 | POS |
| PYRIDOXAL 5'-PHOSPHATE                        | C00018 | 265.03514 | 1.64 | 1.51 | POS |
| PYRIDOXAMINE                                  | C00534 | 168.08988 | 1.11 | 1.11 | POS |
| PYRIDOXINE                                    | C00314 | 169.07389 | 1.64 | 1.26 | POS |
| PYRUVATE                                      | C00022 | 88.01605  | 1.98 | 1.64 | NEG |
| QUINATE                                       | C00296 | 192.06339 | 1.31 | 1.26 | NEG |
| RIBITOL                                       | C00474 | 152.06848 | 1.23 | -    | NEG |
| ROSMARINIC ACID                               | C10489 | 360.08452 | -    | 1.25 | NEG |
| S-(5'-ADENOSYL)-L-HOMOCYSTEINE                | C00021 | 384.12159 | 1.65 | 1.24 | POS |
| S-(5'-ADENOSYL)-L-METHIONINE                  | C00019 | 570.15665 | 1.15 | -    | POS |
| SALICYLAMIDE                                  | CA1193 | 137.04768 | 0.51 | -    | POS |
| SARCOSINE                                     | C00213 | 89.04768  | 1.18 | -    | POS |
| S-CARBOXYMETHYL-L-CYSTEINE                    | C03727 | 179.02523 | 1.31 | 1.26 | POS |
| SELENOCYSTAMINE                               | CA1403 | 247.93309 | 1.09 | 1.09 | POS |
| SELENOMETHIONINE                              | C05335 | 196.99550 | 1.78 | 1.26 | POS |
| SEROTONIN                                     | C00780 | 176.09496 | 3.01 | 2.66 | POS |
| SHIKIMATE                                     | C00493 | 174.05283 | 1.56 | 1.26 | NEG |
| SN-GLYCERO-3-PHOSPHOCHOLINE                   | C00670 | 258.11011 | -    | 1.20 | NEG |
| SN-GLYCEROL 3-PHOSPHATE                       | C00093 | 370.22328 | 1.28 | -    | NEG |
| SPERMIDINE                                    | C00315 | 145.15790 | 1.02 | 1.01 | POS |
| SPERMINE                                      | C00750 | 202.21575 | 1.01 | 1.00 | POS |
| STACHYOSE                                     | C01613 | 666.22186 | 1.24 | 1.20 | POS |
| SUBERIC ACID                                  | C08278 | 174.08921 | -    | 1.28 | NEG |
| SUCCINATE                                     | C00042 | 118.02661 | 2.17 | 2.05 | NEG |
| SUCROSE                                       | C00089 | 342.11622 | 1.26 | -    | NEG |
| TAURINE                                       | C00245 | 125.01467 | 1.21 | 1.20 | POS |
| THEOPHYLLINE                                  | C07130 | 180.06473 | 3.87 | -    | POS |
| THIAMINE                                      | C00378 | 265.11231 | 1.20 | 1.14 | POS |
| THIAMINE MONOPHOSPHATE                        | C01081 | 344.07081 | 1.18 | 1.15 | POS |
| THIAMINE PYROPHOSPHATE                        | C00068 | 265.11176 | -    | 1.65 | NEG |
| THIOPURINE S-METHYLETHER                      | C03542 | 166.03132 | 1.63 | -    | POS |
| THIOUREA                                      | C14415 | 76.00952  | 1.37 | 1.26 | POS |
| THYMIDINE                                     | C00214 | 242.09027 | 3.49 | 1.27 | NEG |
| THYMIDINE 5'-MONOPHOSPHATE                    | C00364 | 322.05661 | 1.85 | 1.90 | NEG |
| THYMIDINE-5'-DIPHOSPHO-ALPHA-D-GLUCOSE        | C00842 | 564.07576 | 1.66 | 1.65 | POS |

|                                            |        |           |      |      |     |
|--------------------------------------------|--------|-----------|------|------|-----|
| THYMINE                                    | C00178 | 126.04293 | 2.25 | 2.31 | POS |
| THYROTROPIN RELEASING HORMONE              | C03958 | 362.17025 | 1.73 | 1.26 | POS |
| TRANS-4-HYDROXYPROLINE                     | C01157 | 131.05824 | 1.23 | 1.20 | POS |
| TRANS-ACONITATE                            | C02341 | 174.01644 | 1.40 | 2.58 | NEG |
| TRIGONELLINE                               | C01004 | 137.04768 | 1.26 | 1.23 | POS |
| TYRAMINE                                   | C00483 | 137.08406 | 1.99 | 1.95 | POS |
| URACIL                                     | C00106 | 112.02728 | 1.64 | 1.25 | POS |
| URATE                                      | C00366 | 168.02834 | 1.64 | 1.26 | NEG |
| URIDINE                                    | C00299 | 244.06954 | 1.80 | 1.26 | NEG |
| URIDINE 5'-DIPHOSPHATE                     | C00015 | 404.00220 | 1.65 | -    | POS |
| URIDINE 5'-DIPHOSPHOGALACTOSE              | C00052 | 566.05503 | 1.37 | 1.42 | POS |
| URIDINE 5'-DIPHOSPHOGLUCOSE                | C00029 | 566.05503 | 1.32 | 1.37 | POS |
| URIDINE 5'-DIPHOSPHOGLUCURONIC ACID        | C00167 | 580.03430 | -    | 2.61 | NEG |
| URIDINE 5'-DIPHOSPHO-N-ACETYLGALACTOSAMINE | C00203 | 607.08154 | 1.38 | 1.41 | POS |
| URIDINE 5'-DIPHOSPHO-N-ACETYLGLUCOSAMINE   | C00043 | 607.08158 | 1.37 | -    | POS |
| URIDINE-5-MONOPHOSPHATE                    | C00105 | 324.03587 | 1.58 | 1.47 | NEG |
| UROCANATE                                  | C00785 | 138.04293 | 1.64 | 1.25 | POS |
| XANTHINE                                   | C00385 | 152.03343 | 1.81 | 1.25 | NEG |
| XANTHOSINE                                 | C01762 | 284.07569 | 2.84 | 1.26 | NEG |
| XANTHOSINE 5'-MONOPHOSPHATE                | C00655 | 364.04202 | 1.64 | 1.72 | NEG |
| XANTHURENIC ACID                           | C02470 | 205.03751 | 1.35 | -    | POS |
| XYLITOL                                    | C00379 | 152.06848 | 1.24 | 1.25 | POS |

Supplementary Table 1 - part 2 - HILIC 15 min method - IROA standard characterization

| COMPOUND NAME                                         | PARENT_CID   | Neutral mass | Rt    |
|-------------------------------------------------------|--------------|--------------|-------|
| (2-AMINOETHYL)PHOSPHONATE                             | C03557       | 125.02418    | 7.10  |
| (R)-MALATE                                            | C00711       | 134.02153    | 0.76  |
| (R,R)-TARTARIC ACID                                   | C00898       | 150.01644    | 1.15  |
| (S)-LACTATE                                           | C01432       | 90.03170     | 0.80  |
| (S)-MALATE                                            | C00711       | 134.02153    | 0.76  |
| (S,S)-TARTARIC ACID                                   | C00898       | 150.01644    | 1.15  |
| 1,2-DIDECANOYL-SN-GLYCERO-3-PHOSPHOCHOLINE            | LMGP01010380 | 565.37436    | 5.39  |
| 1,3-DIAMINOPROPANE                                    | C00986       | 74.08440     | 7.48  |
| 10-HYDROXYDECANOATE                                   | C02774       | 188.14125    | 0.70  |
| 1-AMINOCYCLOPROPANE-1-CARBOXYLATE                     | C01234       | 101.04768    | 4.97  |
| 1-HYDROXY-2-NAPHTHOATE                                | C03203       | 188.04735    | 0.76  |
| 1-METHYL-6,7-DIHYDROXY-1,2,3,4-TETRAHYDROISOQUINOLINE | C09642       | 179.09464    | 4.67  |
| 1-METHYLADENOSINE                                     | C02494       | 281.11241    | 3.60  |
| 1-NAPHTHYLAMINE                                       | C14790       | 143.07350    | 0.85  |
| 2,3-DIHYDROXYBENZOATE                                 | C00196       | 154.02661    | 0.74  |
| 2',4'-DIHYDROXYACETOPHENONE                           | C03663       | 152.04735    | 0.74  |
| 2,4-DIHYDROXYPTERIDINE                                | C03212       | 164.03343    | 0.75  |
| 2,4-DIHYDROXYPYRIMIDINE-5-CARBOXYLIC ACID             | C03030       | 156.01711    | 0.73  |
| 2,5-DIHYDROXYBENZOATE                                 | C00628       | 154.02661    | 0.67  |
| 2-AMINO-2-METHYLPROPANOATE                            | C03665       | 103.06333    | 4.85  |
| 2-AMINOETHYL DIHYDROGEN PHOSPHATE                     | CA1062       | 141.01910    | 6.57  |
| 2-AMINOPHENOL                                         | C01987       | 109.05276    | 2.84  |
| 2'-DEOXYADENOSINE 5'-DIPHOSPHATE                      | C00206       | 411.03451    | 7.73  |
| 2'-DEOXYCYTIDINE 5'-MONOPHOSPHATE                     | C00239       | 307.05694    | 6.30  |
| 2'-DEOXYGUANOSINE 5'-TRIPHOSPHATE                     | C00286       | 506.99575    | 11.78 |
| 2'-DEOXYURIDINE 5'-MONO-PHOS-PHATE                    | C00365       | 308.04096    | 4.98  |
| 2-HYDROXYBUTYRIC ACID                                 | C05984       | 104.04734    | 0.77  |
| 2-HYDROXYPHENYLACETIC ACID                            | CA1444       | 152.04734    | 0.74  |
| 2-HYDROXYPYRIDINE                                     | C02502       | 95.03711     | 1.08  |
| 2-METHYLGLUTARIC ACID                                 | CA1107       | 146.05791    | 0.68  |
| 2-METHYLMALEATE                                       | C02226       | 130.02661    | 0.68  |
| 2-METHYLPROPANAL OXIME                                | C03219       | 87.06841     | 0.75  |
| 2-METHYLPROPANOATE                                    | C02632       | 88.05243     | 0.89  |
| 2-OXOADIPATE                                          | C00322       | 160.03718    | 0.69  |
| 2-QUINOLINECARBOXYLIC ACID                            | C06325       | 173.04768    | 1.67  |
| 3-(2-HYDROXYPHENYL)PROPANOATE                         | C01198       | 166.06300    | 0.70  |
| 3-(4-HYDROXYPHENYL)LACTATE                            | C03672       | 182.05791    | 0.71  |
| 3-(4-HYDROXYPHENYL)PYRUVATE                           | C01179       | 180.04226    | 0.67  |
| 3,4-DIHYDROXYBENZOATE                                 | C00230       | 154.02661    | 0.71  |
| 3,4-DIHYDROXY-L-PHENYLALANINE                         | C00355       | 197.06881    | 4.72  |
| 3,4-DIHYDROXYPHENYL GLYCOL                            | C05576       | 170.05791    | 0.73  |
| 3,4-DIHYDROXYPHENYLACETATE                            | C01161       | 168.04226    | 0.71  |
| 3',5'-CYCLIC AMP                                      | C00575       | 329.05252    | 5.29  |
| 3,5-DIIODO-L-THYRONINE                                | C01060       | 524.89341    | 0.72  |
| 3,5-DIIODO-L-TYROSINE                                 | C01060       | 468.88833    | 0.72  |
| 3ALPHA,12ALPHA-DIHYDROXY-5BETA-CHOLANATE              | C04483       | 392.29266    | 0.70  |
| 3-AMINO-4-HYDROXYBENZOIC ACID                         | C12115       | 153.04259    | 0.81  |
| 3-AMINO-5-HYDROXYBENZOIC ACID                         | C12107       | 153.04260    | 0.74  |
| 3-AMINOISOBUTANOATE                                   | C05145       | 103.06333    | 4.94  |
| 3'-CMP                                                | C05822       | 323.05186    | 6.12  |
| 3-DEHYDROSHIKIMATE                                    | C02637       | 172.03717    | 0.74  |
| 3-HYDROXY-3-METHYLGLUTARATE                           | C03761       | 162.05283    | 0.72  |
| 3-HYDROXYANTHRANILATE                                 | C00632       | 153.04259    | 0.71  |
| 3-HYDROXYBENZALDEHYDE                                 | C03067       | 122.03678    | 0.74  |
| 3-HYDROXYBENZOATE                                     | C00587       | 138.03170    | 0.75  |
| 3-HYDROXYBENZYL ALCOHOL                               | C03351       | 124.05243    | 0.71  |
| 3-HYDROXYBUTANOIC ACID                                | C01089       | 104.04735    | 0.76  |
| 3-HYDROXYKYNURENINE                                   | C02794       | 224.07971    | 4.55  |
| 3-HYDROXYPHENYLACETATE                                | C05593       | 152.04735    | 0.76  |

|                                                                        |          |           |       |
|------------------------------------------------------------------------|----------|-----------|-------|
| 3-METHOXY-4-HYDROXYMANDELATE                                           | C05584   | 198.05283 | 0.74  |
| 3-METHOXYTYRAMINE                                                      | C05587   | 167.09464 | 4.60  |
| 3-METHYGLUTARIC ACID                                                   | CA1192   | 146.05791 | 0.69  |
| 3-METHYL-2-OXINDOLE                                                    | CA1325   | 147.06841 | 0.71  |
| 3-METHYLADENINE                                                        | C00913   | 149.07015 | 5.17  |
| 3-METHYLHISTAMINE                                                      | C15526   | 125.09530 | 7.61  |
| 3-NITRO-L-TYROSINE                                                     | CA1195   | 226.05897 | 4.50  |
| 3-SULFINO-L-ALANINE                                                    | C00606   | 153.00958 | 4.99  |
| 3-UREIDOPROPIONATE                                                     | C02642   | 132.05349 | 0.77  |
| 4-ACETAMIDOBUTANOATE                                                   | C02946   | 145.07389 | 0.73  |
| 4-AMINOBENZOATE                                                        | C00568   | 137.04768 | 0.68  |
| 4-AMINOBUTANOATE                                                       | C00334   | 103.06333 | 4.96  |
| 4-COUMARATE                                                            | C00811   | 164.04735 | 0.70  |
| 4-GUANIDINOBUTANOATE                                                   | C01035   | 145.08513 | 4.73  |
| 4-HYDROXY-2-QUINOLINECARBOXYLIC ACID                                   | C01717   | 189.04259 | 0.73  |
| 4-HYDROXYBENZALDEHYDE                                                  | C00633   | 122.03678 | 0.74  |
| 4-HYDROXYBENZOATE                                                      | C00156   | 138.03170 | 0.74  |
| 4-HYDROXY-L-PHENYLGLYCINE                                              | CA1445   | 167.05824 | 4.64  |
| 4-HYDROXY-L-PROLINE                                                    | C01157   | 131.05824 | 5.37  |
| 4-HYDROXYPHENYLACETATE                                                 | C00642   | 152.04735 | 0.75  |
| 4-IMIDAZOLEACETIC ACID                                                 | C02835   | 126.04293 | 4.94  |
| 4-METHYL-2-OXO-PENTANOIC ACID                                          | C00233   | 130.06299 | 0.69  |
| 4-PYRIDOXATE                                                           | C00847   | 183.05316 | 4.99  |
| 4-QUINOLINECARBOXYLIC ACID                                             | C06414   | 173.04768 | 1.09  |
| 5,6-DIHYDROURACIL                                                      | C00429   | 114.04293 | 2.42  |
| 5-AMINOIMIDAZOLE-4-CARBOXAMIDE-1-BETA-D-RIBOFURANOSYL 5'-MONOPHOSPHATE | C04677   | 338.06275 | 6.23  |
| 5-AMINOPENTANOATE                                                      | C00431   | 117.07898 | 4.93  |
| 5'-DEOXYADENOSINE                                                      | C05198   | 251.10184 | 3.78  |
| 5-HYDROXYINDOLEACETATE                                                 | C05635   | 191.05824 | 0.73  |
| 5-HYDROXY-L-TRYPTOPHAN                                                 | C01017   | 220.08479 | 4.56  |
| 5-HYDROXYMETHYLURACIL                                                  | C03088   | 142.03784 | 0.76  |
| 5-METHYLCYTOSINE HYDROCHLORIDE                                         | C02376   | 125.05891 | 5.00  |
| 5'-METHYLTHIOADENOSINE                                                 | C00170   | 297.08956 | 3.55  |
| 5-OXO-D-PROLINE                                                        | C01879   | 129.04259 | 0.75  |
| 5-OXO-L-PROLINE                                                        | C01879   | 129.04259 | 0.75  |
| 6-CARBOXYHEXANOATE                                                     | C02656   | 160.07356 | 0.70  |
| 6-DEOXY-L-GALACTOSE                                                    | C00382   | 164.06848 | 4.05  |
| 6-HYDROXYDOPAMINE                                                      | CA1404   | 169.07390 | 5.25  |
| 6-HYDROXYNICOTINATE                                                    | C01020   | 139.02694 | 0.75  |
| ACETOACETATE                                                           | C00164   | 102.03169 | 0.79  |
| ACETOIN                                                                | C00466   | 88.05243  | 0.89  |
| ACETYL PHOSPHATE                                                       | C00227   | 139.98750 | 7.00  |
| ADENINE                                                                | C00147   | 135.05450 | 4.70  |
| ADENOSINE                                                              | C00212   | 267.09676 | 3.66  |
| ADENOSINE 2',3'-CYCLIC MONOPHOSPHATE                                   | C02353   | 267.09676 | 5.07  |
| ADENOSINE 3',5'-CYCLIC MONOPHOSPHATE                                   | C00575   | 329.05252 | 5.29  |
| ADENOSINE 5'-DIPHOSPHORIBOSE                                           | C00301   | 559.07168 | 9.06  |
| ADENOSINE 5'-MONOPHOSPHATE                                             | C00020   | 347.06309 | 6.14  |
| ADENOSINE 5'-TRIPHOSPHATE                                              | C00002   | 506.99575 | 11.82 |
| ADIPIC ACID                                                            | CA1042   | 146.05791 | 0.71  |
| AGMATINE SULFATE                                                       | C00179   | 130.12180 | 7.31  |
| ALLANTOIN                                                              | C01551   | 158.04399 | 0.74  |
| ALLOSE                                                                 | C01487   | 180.06339 | 1.08  |
| ALPHA-AMINOADIPATE                                                     | C00956   | 161.06881 | 4.89  |
| ALPHA-D-GALACTOSE 1-PHOSPHATE                                          | C00446   | 260.02971 | 6.05  |
| ALPHA-D-GLUCOSE                                                        | C00293   | 180.06339 | 0.81  |
| ALPHA-D-GLUCOSE 1-PHOSPHATE                                            | C00103   | 260.02972 | 6.11  |
| ALPHA-KETOGLUTARIC ACID                                                | C00026   | 146.02153 | 0.76  |
| ANILINE                                                                | C00292   | 93.05785  | 1.80  |
| ANILINE-2-SULFONIC ACID                                                | C00292-1 | 173.01467 | 0.70  |
| ANTHRANILATE                                                           | C00108   | 137.04768 | 0.67  |



|                                                             |        |           |       |
|-------------------------------------------------------------|--------|-----------|-------|
| AZELAIC ACID                                                | C08261 | 188.10486 | 0.70  |
| BENZOATE                                                    | C00180 | 122.03678 | 0.70  |
| BETA-ALANINE                                                | C00099 | 89.04768  | 5.01  |
| BETAINE                                                     | C00719 | 117.07898 | 5.81  |
| BETA-NICOTINAMIDE ADENINE DINUCLEOTIDE 2'-PHOSPHATE REDUCED | C00006 | 743.07545 | 10.32 |
| BETA-NICOTINAMIDE ADENINE DINUCLEOTIDE PHOSPHATE            | C00006 | 743.07545 | 10.32 |
| BIOTIN                                                      | C00120 | 244.08817 | 0.76  |
| BIS(2-ETHYLHEXYL)PHTHALATE                                  | C03690 | 390.27701 | 0.71  |
| BIS(3-AMINOPROPYL)AMINE                                     | C03375 | 131.14225 | 8.66  |
| BUTANOATE                                                   | C00246 | 88.05243  | 0.83  |
| CADAVERINE                                                  | C01672 | 102.11570 | 7.38  |
| CAFFEATE                                                    | C01481 | 180.04226 | 0.67  |
| CAFFEINE                                                    | C07481 | 194.08038 | 0.98  |
| CARNOSINE                                                   | C00386 | 226.10659 | 7.51  |
| CATECHOL                                                    | C00090 | 110.03678 | 0.71  |
| CHENODEOXYCHOLATE                                           | C02528 | 392.29266 | 0.71  |
| CHOLATE                                                     | C00695 | 408.28758 | 0.72  |
| CHOLESTERYL ACETATE                                         | CA1190 | 428.36543 | 0.69  |
| CHOLINE                                                     | C00114 | 104.10754 | 5.74  |
| CIS-4-HYDROXY-D-PROLINE                                     | C01015 | 131.05824 | 5.20  |
| CITRAMALATE                                                 | C00815 | 148.11402 | 1.12  |
| CITRATE                                                     | C00158 | 192.02701 | 2.25  |
| CITRULLINE                                                  | C00327 | 175.09569 | 5.91  |
| CMP                                                         | C00055 | 323.05186 | 6.22  |
| CORTISOL                                                    | C00735 | 362.20933 | 0.72  |
| CORTISOL 21-ACETATE                                         | C02821 | 404.21989 | 0.69  |
| CREATINE                                                    | C00300 | 131.06948 | 4.98  |
| CREATINE PHOSPHATE                                          | C02305 | 211.03581 | 6.13  |
| CREATININE                                                  | C00791 | 113.05891 | 5.01  |
| CYS-GLY                                                     | C01419 | 178.04122 | 7.10  |
| CYTIDINE                                                    | C00475 | 243.08552 | 5.02  |
| CYTIDINE 2',3'-CYCLIC MONO-PHOS-PHATE                       | C02354 | 305.04129 | 5.63  |
| CYTIDINE 5'-DIPHOSPHATE                                     | C00112 | 403.01819 | 4.95  |
| CYTIDINE 5'-DIPHOSPHOCHOLINE                                | C00307 | 489.11459 | 9.29  |
| CYTOSINE                                                    | C00380 | 111.04326 | 5.02  |
| D-(-)-3-PHOSPHOGLYCERIC ACID                                | C00597 | 185.99294 | 8.57  |
| D-(-)-ARABINOSE                                             | CA1283 | 150.05282 | 0.70  |
| D-(+)-CELLOBIOSE                                            | C00185 | 342.11622 | 4.05  |
| D-(+)-GALACTOSAMINE                                         | C02262 | 179.07938 | 5.53  |
| D-(+)-GLUCOSAMINE                                           | C00329 | 179.07938 | 5.50  |
| D-ALANINE                                                   | C00133 | 89.04768  | 4.98  |
| DAMP                                                        | C00360 | 331.06817 | 6.28  |
| D-ASPARTATE                                                 | C16433 | 133.03751 | 4.86  |
| DEHYDROASCORBATE                                            | C00425 | 174.01644 | 0.75  |
| DEHYDRO-L-(+)-ASCORBIC ACID DIMER                           | C00425 | 348.03288 | 0.75  |
| DEOXYCARNITINE                                              | C05543 | 145.11028 | 5.36  |
| DEOXYCHOLATE                                                | C04483 | 392.29266 | 0.70  |
| DEOXYCYTIDINE                                               | C00881 | 227.09061 | 5.01  |
| DEOXYRIBOSE                                                 | C01801 | 134.05791 | 0.70  |
| DEOXYURIDINE                                                | C00526 | 228.07462 | 0.74  |
| DETHIOBIOTIN                                                | C01909 | 214.13174 | 0.74  |
| D-FRUCTOSE                                                  | C01496 | 180.06339 | 0.80  |
| D-FRUCTOSE 6-PHOSPHATE                                      | C00085 | 260.02972 | 6.46  |
| D-GALACTOSE                                                 | C01582 | 180.06339 | 1.13  |
| D-GLUCONO-1,5-LACTONE                                       | C00198 | 178.04774 | 0.75  |
| D-GLUCOSAMINE 6-PHOSPHATE                                   | C00352 | 259.04571 | 6.47  |
| D-GLUCOSAMINE 6-SULFATE                                     | CA1422 | 259.03619 | 0.78  |
| D-GLUCOSE 6-PHOSPHATE                                       | C00092 | 260.02972 | 6.76  |
| D-GLUCURONIC ACID                                           | C00191 | 194.04265 | 0.76  |
| D-GLUCURONOLACTONE                                          | C02670 | 176.03209 | 0.74  |
| D-GLYCERIC ACID                                             | C00258 | 106.02661 | 1.13  |

|                                      |        |           |      |
|--------------------------------------|--------|-----------|------|
| D-GULONIC ACID GAMA-LACTONE          | C00800 | 178.04774 | 0.75 |
| DIETHANOLAMINE                       | C06772 | 105.07898 | 5.30 |
| DIHYDROXYMANDELIC ACID               | C07470 | 184.03718 | 0.72 |
| DIMETHYLBENZIMIDAZOLE                | C03114 | 146.08440 | 4.51 |
| DL-5-HYDROXYLYSINE                   | C01211 | 162.10044 | 7.19 |
| DL-NORMETANEPHRINE                   | CA1379 | 183.08954 | 4.70 |
| D-MANNOSAMINE                        | C03570 | 179.07938 | 5.35 |
| D-MANNOSE 6-PHOSPHATE                | C00275 | 260.02972 | 5.87 |
| DOPAMINE                             | C03758 | 153.07898 | 4.68 |
| D-ORNITHINE                          | C00515 | 132.08987 | 7.18 |
| D-PANTOTHENIC ACID                   | C00864 | 219.11067 | 0.75 |
| D-PSICOSE                            | C06468 | 180.06339 | 1.40 |
| D-RIBOSE                             | C08353 | 150.05283 | 0.70 |
| D-RIBOSE 5-PHOSPHATE                 | C00117 | 230.01916 | 6.23 |
| D-SACCHARIC ACID                     | C00818 | 210.03757 | 6.44 |
| D-SORBITOL                           | C00749 | 180.06339 | 0.75 |
| D-TRYPTOPHAN                         | C00806 | 204.08988 | 4.50 |
| D-XYLOSE                             | C01394 | 150.05283 | 0.70 |
| EPINEPHRINE                          | C00788 | 183.08954 | 4.88 |
| ERYTHRITOL                           | C00503 | 122.05791 | 0.70 |
| ETHANOLAMINE PHOSPHATE               | C00346 | 141.01910 | 6.84 |
| ETHYL 3-INDOLEACETATE                | CA1213 | 203.09463 | 0.73 |
| ETHYLMALONIC ACID                    | CA1366 | 132.04226 | 0.69 |
| FERULATE                             | C01494 | 194.05791 | 0.70 |
| FLAVIN ADENINE DINUCLEOTIDE          | C00016 | 785.15714 | 8.78 |
| FORMYL-L-METHIONYL PEPTIDE           | C03145 | 177.04597 | 0.70 |
| FRUCTOSE 1,6-BIPHOSPHATE             | C00354 | 339.99606 | 3.35 |
| FUMARATE                             | C00122 | 116.01096 | 0.71 |
| GALACTARATE                          | C01807 | 210.03757 | 3.09 |
| GALACTITOL                           | C01697 | 182.07904 | 2.92 |
| GLUCONIC ACID                        | CA1492 | 196.05830 | 3.94 |
| GLUCOSAMINATE                        | C03752 | 195.07429 | 5.73 |
| GLUTARATE                            | C00489 | 132.04226 | 0.70 |
| GLUTARIC ACID                        | C00489 | 132.04226 | 0.70 |
| GLUTATHIONE                          | C00051 | 307.08381 | 5.02 |
| GLYCERATE                            | C00258 | 106.02661 | 1.13 |
| GLYCEROL 2-PHOSPHATE                 | C02979 | 172.01367 | 4.92 |
| GLYCINE                              | C00037 | 75.03203  | 5.14 |
| GLYCOCHOLATE                         | C01921 | 465.30904 | 0.72 |
| GUANIDINOACETATE                     | C00581 | 117.05383 | 4.85 |
| GUANOSINE                            | C00387 | 283.09167 | 3.22 |
| GUANOSINE 3',5'-CYCLIC MONOPHOSPHATE | C00942 | 345.04744 | 0.73 |
| GUANOSINE 5'-DIPHOSPHO-D-MANNOSE     | C00096 | 605.07716 | 8.67 |
| HEXANOATE                            | C01585 | 116.08373 | 0.70 |
| HIPPURATE                            | C01586 | 179.05824 | 0.71 |
| HISTAMINE                            | C00388 | 111.07965 | 7.37 |
| HOMOCYSTINE                          | C01817 | 268.05515 | 6.53 |
| HOMOGENISATE                         | C00544 | 168.04226 | 0.68 |
| HOMOSERINE                           | C00263 | 119.05824 | 5.07 |
| HOMOVANILLATE                        | C05582 | 182.05791 | 0.72 |
| HYDROQUINONE                         | C00530 | 110.03678 | 0.67 |
| HYPOTAURINE                          | C00519 | 109.01975 | 5.71 |
| HYPOXANTHINE                         | C00262 | 136.03851 | 2.21 |
| INDOLE-3-ACETALDEHYDE                | C00637 | 159.06841 | 0.69 |
| INDOLE-3-ACETAMIDE                   | C02693 | 174.07931 | 0.72 |
| INDOLE-3-ACETATE                     | C00954 | 175.06333 | 0.73 |
| INDOLE-3-ACETIC ACID                 | C00954 | 175.06333 | 0.73 |
| INDOLE-3-ETHANOL                     | C00955 | 161.08406 | 0.72 |
| INDOLE-3-PYRUVIC ACID                | CA1282 | 203.05824 | 0.76 |
| INDOXYL SULFATE                      | C08481 | 133.05277 | 0.48 |
| INOSINE                              | C00294 | 268.08077 | 2.02 |

|                             |           |           |      |
|-----------------------------|-----------|-----------|------|
| INOSINE 5'-MONOPHOSPHATE    | C00130    | 348.04710 | 6.04 |
| INOSINE 5'-PHOSPHATE        | C00130    | 348.04710 | 6.04 |
| ISOCITRIC ACID              | C00311    | 192.02701 | 1.01 |
| ITACONATE                   | C00490    | 130.02661 | 0.68 |
| KYNURENINE                  | C01718    | 208.08479 | 4.60 |
| L-2,3-DIAMINOPROPIONIC ACID | C03401    | 104.05858 | 6.87 |
| L-2-PHOSPHOGLYCERIC ACID    | CA1485    | 164.06848 | 0.70 |
| L-ALANINE                   | C01401    | 89.04768  | 5.01 |
| L-ALLOTHREONINE             | C05519    | 119.05824 | 5.02 |
| L-ARABITOL                  | CA1387    | 152.06848 | 0.81 |
| L-ARGININE                  | C00062    | 174.11168 | 7.03 |
| L-ASPARAGINE                | C16438    | 132.05349 | 5.42 |
| L-ASPARTATE                 | C16433    | 133.03751 | 4.86 |
| LAUROYLCARNITINE            | CA1406    | 343.27225 | 4.35 |
| L-CARNITINE                 | C00318    | 161.10519 | 5.31 |
| L-CYSTATHIONINE             | C00542    | 222.06743 | 6.79 |
| L-CYSTEINE                  | C00736    | 121.01975 | 4.83 |
| L-CYSTINE                   | C01420    | 240.02385 | 6.77 |
| LEUCINE                     | C16439    | 131.09463 | 4.61 |
| L-GLUTAMIC ACID             | C00302    | 147.05316 | 4.87 |
| L-GLUTAMINE                 | C00303    | 146.06914 | 5.50 |
| L-HISTIDINE                 | C00135    | 155.06947 | 7.06 |
| L-HISTIDINOL                | C00860    | 141.09021 | 7.31 |
| L-HOMOCYSTEINE THIOLACTONE  | CE1401    | 117.02483 | 4.80 |
| LIPOAMIDE                   | C00248    | 205.05951 | 0.72 |
| L-ISOLEUCINE                | C16434    | 131.09463 | 4.61 |
| L-KYNURENINE                | C01718    | 208.08479 | 4.60 |
| LL-2,6-DIAMINOHEPTANEDIOATE | C00666    | 190.09536 | 6.98 |
| L-LYSINE                    | C16440    | 146.10553 | 7.23 |
| L-METHIONINE                | C01733    | 149.05105 | 4.72 |
| L-METHIONINE SULFOXIMINE    | C03510    | 180.05687 | 6.09 |
| L-NORVALINE                 | CA1395    | 117.07898 | 4.71 |
| L-ORNITHINE                 | C00077    | 132.08987 | 7.18 |
| L-PHENYLALANINE             | C02057    | 165.07898 | 4.57 |
| L-PIPECOLIC ACID            | C00408    | 129.07898 | 4.20 |
| L-PROLINE                   | C16435    | 115.06333 | 5.21 |
| L-SERINE                    | C00716    | 105.04259 | 5.10 |
| L-SORBOSE                   | C01452    | 180.06339 | 0.80 |
| L-THREONINE                 | CA1381    | 119.05824 | 5.03 |
| L-TRYPTOPHAN                | C00078    | 204.08988 | 4.51 |
| L-TRYPTOPHANAMIDE           | C00977    | 203.10586 | 4.70 |
| L-TYROSINE                  | C01536    | 181.07389 | 4.66 |
| L-VALINE                    | C16436    | 117.07898 | 4.81 |
| MALEIC ACID                 | C01384    | 116.01096 | 0.66 |
| MALONATE                    | C00383    | 104.01096 | 0.69 |
| MALTOSE                     | C00208    | 342.11622 | 0.82 |
| MANDELIC ACID               | CA1444    | 152.04734 | 0.74 |
| MANNITOL                    | C00392    | 182.07904 | 0.82 |
| MANNOSE                     | C00159    | 180.06339 | 1.41 |
| MELATONIN                   | C01598    | 232.12118 | 0.73 |
| MELIBIOSE                   | C05402    | 342.11622 | 0.81 |
| MERCAPTOPYRUVATE            | C00957    | 119.98812 | 0.73 |
| MESO-TARTARIC ACID          | C00552    | 168.02701 | 0.75 |
| METHYL BETA-D-GALACTOSIDE   | C03619    | 194.07904 | 0.70 |
| METHYL INDOLE-3-ACETATE     | CA1231    | 189.07898 | 0.74 |
| METHYL JASMONATE            | C11512    | 224.14125 | 0.68 |
| METHYLGUANIDINE             | C02294    | 73.06400  | 4.93 |
| METHYLMALONATE              | C02170    | 118.02661 | 0.68 |
| MEVALOLACTONE               | CA1383    | 130.06300 | 0.72 |
| MONO-ETHYL MALONATE         | HMDB00576 | 132.04226 | 0.70 |
| MONO-METHYL GLUTARATE       | CA1015    | 146.05791 | 0.74 |

|                                            |        |           |      |
|--------------------------------------------|--------|-----------|------|
| MYO-INOSITOL                               | C00137 | 180.06339 | 0.81 |
| N(PAI)-METHYL-L-HISTIDINE                  | C01152 | 169.08513 | 7.51 |
| N,N-DIMETHYL-1,4-PHENYLENEDIAMINE          | C04203 | 136.10005 | 4.76 |
| N1-ACETYLSPERMINE                          | C02567 | 244.22631 | 8.84 |
| N6-(DELTA2-ISOPENTENYL)-ADENINE            | C04083 | 203.11710 | 4.05 |
| N-ACETYL-D-GALACTOSAMINE                   | C01074 | 221.08994 | 0.81 |
| N-ACETYL-DL-GLUTAMIC ACID                  | CA1454 | 189.06372 | 0.75 |
| N-ACETYL-DL-METHIONINE                     | CA1210 | 191.06162 | 0.72 |
| N-ACETYL-DL-SERINE                         | CA1449 | 147.05316 | 0.75 |
| N-ACETYL-D-TRYPTOPHAN                      | C03137 | 246.10044 | 0.71 |
| N-ACETYLGLYCINE                            | CA1212 | 117.04259 | 0.74 |
| N-ACETYL-L-ALANINE                         | CE1554 | 131.05824 | 0.71 |
| N-ACETYL-L-ASPARTIC ACID                   | CA1200 | 175.04807 | 0.73 |
| N-ACETYL-L-CYSTEINE                        | CE1310 | 162.02249 | 0.70 |
| N-ACETYL-L-LEUCINE                         | C02710 | 173.10519 | 0.71 |
| N-ACETYL-L-PHENYLALANINE                   | C03519 | 207.08954 | 0.71 |
| N-ACETYLNEURAMINATE                        | C00270 | 309.10598 | 3.28 |
| N-ACETYLPUTRESCINE                         | C02714 | 130.11061 | 5.77 |
| N-ACETYLSEROTONIN                          | C00978 | 218.10553 | 0.74 |
| NAD                                        | C00003 | 663.10912 | 8.54 |
| N-ALPHA-ACETYL-L-ASPARAGINE                | CA1214 | 174.06406 | 0.76 |
| NALPHA-ACETYL-L-LYSINE                     | CA1219 | 188.11609 | 5.34 |
| N-AMIDINO-L-ASPARTATE                      | C03139 | 175.05931 | 4.64 |
| NEPSILON,NEPSILON,NEPSILON-TRIMETHYLLYSINE | C03793 | 188.15248 | 8.36 |
| N-FORMYLGLYCINE                            | CA1268 | 103.02694 | 0.74 |
| NICOTINAMIDE                               | C00153 | 122.04801 | 1.87 |
| NICOTINAMIDE MONONUCLEOTIDE                | C00455 | 334.05661 | 6.59 |
| NICOTINATE                                 | C00253 | 123.03203 | 1.08 |
| N-METHYL-D-ASPARTIC ACID                   | C12269 | 147.05316 | 4.78 |
| N-METHYL-L-GLUTAMATE                       | C01046 | 161.06881 | 4.91 |
| NORADRENALINE                              | C00547 | 169.07389 | 4.87 |
| NORLEUCINE                                 | C01933 | 131.09463 | 4.59 |
| O-ACETYL-L-CARNITINE                       | C02571 | 203.11576 | 5.11 |
| O-ACETYL-L-SERINE                          | C00979 | 147.05316 | 4.92 |
| OCTOPAMINE                                 | C04227 | 153.07897 | 4.64 |
| OMEGA-HYDROXYDODECANOIC ACID               | C08317 | 216.17255 | 0.69 |
| O-PHOSPHO-DL-SERINE                        | CA1209 | 185.00893 | 7.77 |
| O-PHOSPHO-L-SERINE                         | CA1388 | 185.00893 | 7.99 |
| OPHTHALMIC ACID                            | CA1475 | 289.12739 | 5.21 |
| OXALOMALIC ACID                            | C01990 | 206.00627 | 5.44 |
| PALATINOSE                                 | C01742 | 342.11621 | 3.49 |
| PARAXANTHINE                               | C13747 | 180.06473 | 1.04 |
| PHENYLACETIC ACID                          | C07086 | 136.05243 | 0.74 |
| PHENYLETHANOLAMINE                         | C02735 | 137.08406 | 4.57 |
| PHENYLPYRUVATE                             | C00166 | 164.04735 | 0.71 |
| PHOSPHOCHOLINE                             | C00588 | 183.06604 | 7.88 |
| PHOSPHOCREATINE                            | C02305 | 211.03581 | 6.13 |
| PHOSPHONOACETATE                           | C05682 | 139.98746 | 7.08 |
| PIPECOLATE                                 | C00408 | 129.07898 | 4.20 |
| PTERIN                                     | CA1303 | 163.04941 | 2.02 |
| PURINE                                     | C00465 | 120.04360 | 1.96 |
| PUTRESCINE                                 | C00134 | 88.10005  | 7.42 |
| PYRIDOXAL                                  | C00250 | 167.05824 | 4.56 |
| PYRIDOXAMINE                               | C00534 | 168.08988 | 7.03 |
| PYRIDOXINE                                 | C00314 | 169.07389 | 5.07 |
| PYRUVATE                                   | C00022 | 88.01605  | 0.67 |
| QUINATE                                    | C00296 | 192.06339 | 4.56 |
| REICHSTEIN'S SUBSTANCE S                   | C05488 | 346.21441 | 0.70 |
| RESORCINOL MONOACETATE                     | C12064 | 152.04735 | 0.75 |
| RIBITOL                                    | C00474 | 152.06848 | 0.82 |
| RIBOFLAVIN                                 | C00255 | 376.13829 | 0.78 |

|                                            |        |           |       |
|--------------------------------------------|--------|-----------|-------|
| ROSMARINIC ACID                            | C10489 | 360.08452 | 0.66  |
| S-(5'-ADENOSYL)-L-HOMOCYSTEINE             | C00021 | 384.12159 | 6.35  |
| SALICYLAMIDE                               | CA1193 | 137.04768 | 0.72  |
| SALICYLATE                                 | C00805 | 138.03170 | 0.71  |
| SARCOSINE                                  | C00213 | 89.04768  | 5.21  |
| S-CARBOXYMETHYL-L-CYSTEINE                 | C03727 | 179.02523 | 4.71  |
| SELENOCYSTAMINE                            | CA1403 | 247.93309 | 7.22  |
| SELENOMETHIONINE                           | C05335 | 196.99550 | 4.66  |
| SEROTONIN                                  | C00780 | 176.09496 | 4.56  |
| S-HEXYL-GLUTATHIONE                        | C02886 | 391.17771 | 4.57  |
| SHIKIMATE                                  | C00493 | 174.05283 | 0.76  |
| SPERMIDINE                                 | C00315 | 145.15790 | 8.73  |
| SPERMINE                                   | C00750 | 202.21575 | 11.62 |
| SPHINGANINE                                | C00836 | 301.29808 | 4.27  |
| SUBERIC ACID                               | C08278 | 174.08921 | 0.71  |
| SUCCINATE                                  | C00042 | 118.02661 | 0.71  |
| SUCROSE                                    | C00089 | 342.11622 | 0.82  |
| TAURINE                                    | C00245 | 125.01467 | 3.69  |
| TAUROLITHOCHOLATE                          | C02592 | 483.30185 | 0.70  |
| THEOBROMINE                                | C07480 | 180.06473 | 1.04  |
| THEOPHYLLINE                               | C07130 | 180.06473 | 0.77  |
| THIAMINE                                   | C00378 | 265.11231 | 7.61  |
| THIAMINE MONOPHOSPHATE                     | C01081 | 344.07081 | 8.66  |
| THIAMINE PYROPHOSPHATE                     | C00068 | 265.11176 | 7.04  |
| THIOPURINE S-METHYLETHER                   | C03542 | 166.03132 | 0.90  |
| THYMIDINE                                  | C00214 | 242.09027 | 0.76  |
| THYMIDINE 5'-MONOPHOSPHATE                 | C00364 | 322.05661 | 4.13  |
| THYMIDINE-5'-DIPHOSPHO-ALPHA-D-GLUCOSE     | C00842 | 564.07576 | 8.05  |
| THYMINE                                    | C00178 | 126.04293 | 0.73  |
| THYROTROPIN RELEASING HORMONE              | C03958 | 362.17025 | 6.58  |
| TRANS-4-HYDROXYPROLINE                     | C01157 | 131.05824 | 5.37  |
| TRANS-ACONITATE                            | C02341 | 174.01644 | 0.68  |
| TRANS-CYCLOHEXANE-1,2-DIOL                 | C03739 | 116.08373 | 0.66  |
| TRIGONELLINE                               | C01004 | 137.04768 | 5.69  |
| TRYPTAMINE                                 | C00398 | 160.10005 | 4.48  |
| TYRAMINE                                   | C00483 | 137.08406 | 4.56  |
| URACIL                                     | C00106 | 112.02728 | 0.75  |
| URATE                                      | C00366 | 168.02834 | 0.77  |
| URIDINE                                    | C00299 | 244.06954 | 0.74  |
| URIDINE 5'-DIPHOSPHOGALACTOSE              | C00052 | 566.05503 | 8.31  |
| URIDINE 5'-DIPHOSPHOGLUCOSE                | C00029 | 566.05503 | 8.29  |
| URIDINE 5'-DIPHOSPHO-N-ACETYLGALACTOSAMINE | C00203 | 607.08154 | 8.17  |
| URIDINE 5'-DIPHOSPHO-N-ACETYLGLUCOSAMINE   | C00043 | 607.08158 | 8.17  |
| URIDINE-5-MONOPHOSPHATE                    | C00105 | 324.03587 | 4.98  |
| UROCANATE                                  | C00785 | 138.04293 | 4.42  |
| VITAMIN D2                                 | C05441 | 396.33922 | 0.68  |
| XANTHINE                                   | C00385 | 152.03343 | 1.08  |
| XANTHOSINE                                 | C01762 | 284.07569 | 0.79  |
| XANTHOSINE 5'-MONOPHOSPHATE                | C00655 | 364.04202 | 5.94  |
| XANTHURENIC ACID                           | C02470 | 205.03751 | 3.78  |
| XYLITOL                                    | C00379 | 152.06848 | 0.81  |
