# Supplementary material
Source: PubMed Central journal article supplement (PMC5364945)
Supplement: NIHMS851367-supplement-Supp_TableS2.pdf [file NIHMS851367-supplement-Supp_TableS2.pdf]

Supplementary Table 2

| Metabolite name             | Pathway    | Concentrations (pmol injected) |          |          |          |          |          |          |          |          | r      | r2     |
|-----------------------------|------------|--------------------------------|----------|----------|----------|----------|----------|----------|----------|----------|--------|--------|
|                             |            | 0                              | 5        | 50       | 75       | 250      | 500      | 750      | 2500     | 5000     |        |        |
| D-Glucose                   | GLYCOLYSIS | 0.00E+00                       | 6.09E+04 | 1.08E+05 | 2.49E+05 | 6.66E+05 | 1.05E+06 | 1.98E+06 | 4.84E+06 | 8.65E+06 | 0.9966 | 0.9932 |
| Glucose 6-phosphate         |            | 0.00E+00                       | 1.10E+05 | 1.40E+06 | 2.70E+06 | 8.40E+06 | 1.45E+07 | 2.50E+07 | 9.30E+07 | 1.60E+08 | 0.9972 | 0.9945 |
| Fructose 1,6-bisphosphate   |            | 0.00E+00                       | 1.84E+07 | 5.01E+07 | 8.59E+07 | 1.69E+08 | 2.84E+08 | 7.40E+08 | 1.90E+09 | 3.70E+09 | 0.998  | 0.9967 |
| Lactate                     | TCA        | 0.00E+00                       | 9.01E+05 | 6.71E+05 | 6.55E+05 | 5.94E+06 | 1.48E+07 | 2.65E+07 | 1.29E+08 | 2.60E+08 | 0.9985 | 0.9971 |
| Citrate                     |            | 0.00E+00                       | 5.46E+05 | 3.86E+06 | 4.01E+06 | 1.55E+07 | 3.42E+07 | 1.08E+08 | 3.25E+08 | 7.24E+08 | 0.9979 | 0.9957 |
| alpha-Ketoglutarate         |            | 0.00E+00                       | 3.70E+04 | 2.40E+05 | 3.90E+05 | 8.50E+05 | 2.00E+06 | 2.70E+06 | 8.30E+06 | 1.50E+07 | 0.9985 | 0.9970 |
| Fumarate                    | GLUTATH.   | 0.00E+00                       | 1.04E+06 | 2.68E+06 | 2.60E+06 | 4.07E+06 | 6.36E+06 | 1.30E+07 | 2.88E+07 | 5.49E+07 | 0.9971 | 0.9942 |
| Malate                      |            | 0.00E+00                       | 1.56E+06 | 1.23E+07 | 2.69E+07 | 5.47E+07 | 1.08E+08 | 2.40E+08 | 5.10E+08 | 1.06E+09 | 0.9969 | 0.9938 |
| Glutamate                   |            | 0.00E+00                       | 4.67E+06 | 2.43E+07 | 1.00E+08 | 2.06E+08 | 4.83E+08 | 8.16E+08 |          |          | 0.9946 | 0.9893 |
| Glycine                     | Co-Factor  | 0.00E+00                       | 1.00E+06 | 1.05E+07 | 1.60E+07 | 3.50E+07 | 5.79E+07 | 7.60E+07 | 2.12E+08 | 4.38E+08 | 0.9991 | 0.9981 |
| Reduced Glutathione (GSH)   |            | 0.00E+00                       | 3.28E+07 | 2.31E+08 | 5.22E+08 | 9.95E+08 | 1.61E+09 | 2.25E+09 | 6.50E+09 | 1.04E+10 | 0.9927 | 0.9854 |
| Oxidized Glutathione (GSSG) |            | 0.00E+00                       | 4.00E+05 | 7.90E+06 | 1.60E+07 | 4.00E+07 | 9.00E+07 | 1.40E+08 |          |          | 0.9987 | 0.9973 |
| NADH                        |            | 0.00E+00                       | 9.15E+03 | 4.34E+05 | 3.42E+06 | 2.93E+07 | 5.86E+07 | 1.96E+08 | 5.10E+08 | 1.15E+09 | 0.9973 | 0.9945 |
