# Supplementary material
Source: PubMed Central journal article supplement (PMC5364945)
Supplement: NIHMS851367-supplement-Supp_TableS3.pdf [file NIHMS851367-supplement-Supp_TableS3.pdf]

Supplementary Table 2 - Part 1 - Tech Mixes 3 min method

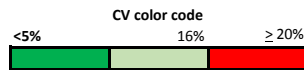

|                              | Tech Mixes |            |            |            |            |            |            |            |            |             | CV quantiation |
|------------------------------|------------|------------|------------|------------|------------|------------|------------|------------|------------|-------------|----------------|
|                              | Tech Mix 1 | Tech Mix 2 | Tech Mix 3 | Tech Mix 4 | Tech Mix 5 | Tech Mix 6 | Tech Mix 7 | Tech Mix 8 | Tech Mix 9 | Tech Mix 10 |                |
| Alanine                      | 19823000   | 19549420   | 20300810   | 19753080   | 17783710   | 15900490   | 17106370   | 19996110   | 16297640   | 16799720    | 9.20%          |
| Arginine                     | 1890132    | 1844634    | 1911983    | 1678578    | 1788005    | 1719426    | 1684063    | 1762227    | 1597675    | 1636920     | 6.14%          |
| Asparagine                   | 1226639    | 1190247    | 1272346    | 1197186    | 1232584    | 1209208    | 928597.7   | 1172644    | 1157091    | 1190194     | 7.83%          |
| Aspartate                    | 4673144    | 4439319    | 4260174    | 4413225    | 3988912    | 3499316    | 3630575    | 3806914    | 3623563    | 3536460     | 11.03%         |
| Cysteine                     | 441968     | 437735.8   | 320530.7   | 365642.2   | 379797.5   | 383379.4   | 334010.8   | 362673.3   | 393643.3   | 306964.9    | 12.11%         |
| Glutamate                    | 12534810   | 12030380   | 11485640   | 12361270   | 11358340   | 10591590   | 10356710   | 10699960   | 10411490   | 10150490    | 7.99%          |
| Glutamine                    | 16133180   | 18829610   | 17328050   | 16615210   | 16761590   | 15905680   | 12391230   | 15417950   | 15050710   | 14588440    | 10.80%         |
| Glycine                      | 23207920   | 21159060   | 19884640   | 18915530   | 26385780   | 25361270   | 24757410   | 23786960   | 23250450   | 22598280    | 10.22%         |
| Histidine                    | 4214554    | 4693970    | 4484494    | 4324786    | 4047782    | 3764251    | 3745851    | 3580645    | 4295124    | 3557634     | 9.54%          |
| Isoleucine                   | 10490090   | 10647940   | 10775660   | 11227180   | 11310150   | 11222940   | 11220040   | 11035660   | 11113640   | 11816730    | 3.39%          |
| Leucine                      | 98000620   | 99969980   | 105072500  | 98629920   | 96998980   | 93202390   | 95678950   | 86244820   | 89185440   | 85970410    | 6.45%          |
| Lysine                       | 7529546    | 7893562    | 7426024    | 6938518    | 7511948    | 7566504    | 5883858    | 6848210    | 6787822    | 5543444     | 10.67%         |
| Methionine                   | 11420030   | 12187430   | 12662290   | 11768290   | 11819940   | 11101020   | 11557410   | 10134820   | 10571920   | 10020690    | 7.55%          |
| Phenylalanine                | 14586420   | 14696230   | 16854960   | 14730160   | 16586400   | 16365830   | 14466430   | 15355830   | 13429140   | 12692300    | 9.16%          |
| Proline                      | 93870820   | 95310260   | 86530600   | 88048000   | 87830820   | 81616070   | 86822270   | 82920340   | 83265280   | 79059320    | 5.99%          |
| Serine                       | 1369520    | 1209952    | 1245313    | 1209061    | 1280354    | 1259703    | 1047480    | 1172172    | 1190177    | 1128581     | 7.24%          |
| Threonine                    | 4765798    | 5084500    | 4829150    | 4752974    | 4796900    | 4550048    | 3741161    | 4472280    | 4513146    | 4368508     | 7.83%          |
| Tryptophan                   | 4508632    | 4563058    | 4727635    | 3494704    | 4229714    | 4497828    | 3629546    | 4620714    | 4305950    | 4995822     | 10.44%         |
| Tyrosine                     | 27065260   | 28697020   | 30863430   | 28824080   | 27169860   | 26170470   | 26890400   | 24636920   | 25217820   | 23975870    | 7.79%          |
| Valine                       | 163358000  | 170082800  | 166850000  | 158806600  | 172189700  | 165954200  | 162195200  | 168710500  | 157818100  | 150285900   | 4.02%          |
| Hypoxanthine                 | 9423418    | 9630433    | 10040740   | 9826187    | 9669788    | 9739228    | 9925192    | 9042049    | 9736605    | 8970325     | 3.66%          |
| Adenine                      | 4206931    | 5171414    | 4390671    | 4583442    | 4048478    | 4208674    | 4551977    | 4536511    | 4641490    | 4274424     | 6.99%          |
| Nicotinamide                 | 36350080   | 38466070   | 34806080   | 32715170   | 35633730   | 37378350   | 36348410   | 33067200   | 33591760   | 32921120    | 5.75%          |
| Adenosine                    | 614896.9   | 546715.8   | 581181.5   | 564588     | 548105     | 559112     | 586386     | 518313     | 514349     | 542257      | 5.58%          |
| Orthophosphate               | 3336321    | 3362987    | 3585565    | 3568828    | 3690411    | 3666504    | 3744256    | 3931237    | 4011897    | 4492072     | 9.25%          |
| Diphosphate                  | 47247.23   | 43507.14   | 38971.5    | 52480.41   | 64003.62   | 51023.02   | 51349.13   | 49035.53   | 48667.8    | 42912.4     | 13.95%         |
| D-Glucose                    | 4466316    | 3890375    | 4000985    | 3576913    | 3521361    | 3279279    | 3589375    | 3528437    | 3498880    | 3681632     | 9.40%          |
| D-Glucose 6-phosphate        | 251401     | 239967.5   | 279871.8   | 274060     | 300767.4   | 280507.4   | 306141.2   | 315399     | 291008.2   | 368023      | 12.53%         |
| D-Fructose 1-6-bisphosphate  | 542079.5   | 599274.2   | 467511.1   | 425698.3   | 453780     | 451990.8   | 415513.8   | 463121.2   | 567641.2   | 523347.6    | 13.49%         |
| D-Glyceraldehyde 3-phosphate | 226461.8   | 211310.6   | 229797.9   | 204948.5   | 244091.1   | 215966.6   | 235805.2   | 206964     | 258875.8   | 271539.8    | 9.81%          |
| 2-3-Bisphosphoglycerate      | 86698.9    | 82588.76   | 63474.96   | 109340     | 85508.91   | 87236.93   | 91416.34   | 66714.09   | 99398.89   | 89083.88    | 15.60%         |
| 2/3-Phospho-D-glycerate      | 1647635    | 1852843    | 1901056    | 2173993    | 2078016    | 2232515    | 2511264    | 2478458    | 2719111    | 2146920     | 15.21%         |
| Phosphoenolpyruvate          | 789773.2   | 777982.5   | 757902     | 720277.3   | 691474.5   | 723481.2   | 721664     | 735336.5   | 775139.2   | 674014.6    | 5.23%          |
| Pyruvate                     | 2595486    | 2778765    | 2653935    | 2581715    | 2491563    | 2691801    | 2508577    | 2459278    | 2523912    | 2438673     | 4.29%          |
| Lactate                      | 33936240   | 37051650   | 40194010   | 39411130   | 40853350   | 41781160   | 37132110   | 36425470   | 38646740   | 37651300    | 6.15%          |
| Citrate                      | 27279270   | 23925750   | 23125290   | 22243370   | 20382420   | 19842640   | 21890390   | 18459400   | 20418540   | 20283320    | 11.97%         |
| alpha-Ketoglutarate          | 244927.5   | 203503.2   | 222685.3   | 197267.1   | 206561.2   | 168814.2   | 193600.1   | 183446.1   | 165746.3   | 159192.5    | 13.67%         |
| Fumarate                     | 1027164    | 1014676    | 1029035    | 986911.8   | 942048.7   | 917097.8   | 977066.5   | 921815.7   | 1004787    | 947665.3    | 4.32%          |
| Malate                       | 14914700   | 14902290   | 14682210   | 14413420   | 13755920   | 13233360   | 14628660   | 12621360   | 13638610   | 13743760    | 5.50%          |
| Sedoheptulose 1-phosphate    | 9204.649   | 7259.828   | 6340.283   | 8818.331   | 8755.61    | 7689.714   | 6013.762   | 5749.645   | 7419.848   | 7304.34     | 16.30%         |
| alpha-D-Ribose 1-phosphate   | 247653     | 278069.9   | 255583.3   | 258290.5   | 244583.3   | 235872     | 291714     | 272436.6   | 297412.2   | 311700.7    | 9.47%          |
| Glutathione                  | 398083000  | 408839100  | 461201300  | 419797300  | 398256300  | 390376800  | 398598300  | 386737400  | 375088900  | 340075000   | 7.79%          |
| Glutathione disulfide        | 13525720   | 14064530   | 15772250   | 14349840   | 13401560   | 14211000   | 14399320   | 13275980   | 13838900   | 11897680    | 7.11%          |
| 5-Oxoprolin                  | 14342500   | 16364560   | 15291240   | 14720730   | 14984180   | 14568960   | 11290380   | 14345530   | 13906500   | 13885820    | 9.02%          |
| S-Glutathionyl-L-cysteine    | 367144.6   | 326432.2   | 401833.1   | 410403.8   | 331011.5   | 383156.7   | 310447.3   | 258221.1   | 333834.8   | 267906.1    | 15.67%         |
| Urate                        | 19756990   | 20739710   | 22170680   | 20123510   | 21924770   | 20293090   | 18618090   | 20634660   | 20445130   | 20438080    | 4.94%          |
